# Supplementary material
Source: PubMed Central journal article supplement (PMC7000998)
Supplement: mmc1.pdf [file mmc1.pdf]

## **Supplemental Information**

### **MicroRNA 223 3p Negatively Regulates the NLRP3**

### **Inflammasome in Acute and Chronic Liver Injury**

**Carolina Jimenez Calvente, Hana Del Pilar, Masahiko Tameda, Casey D. Johnson, and Ariel E. Feldstein**

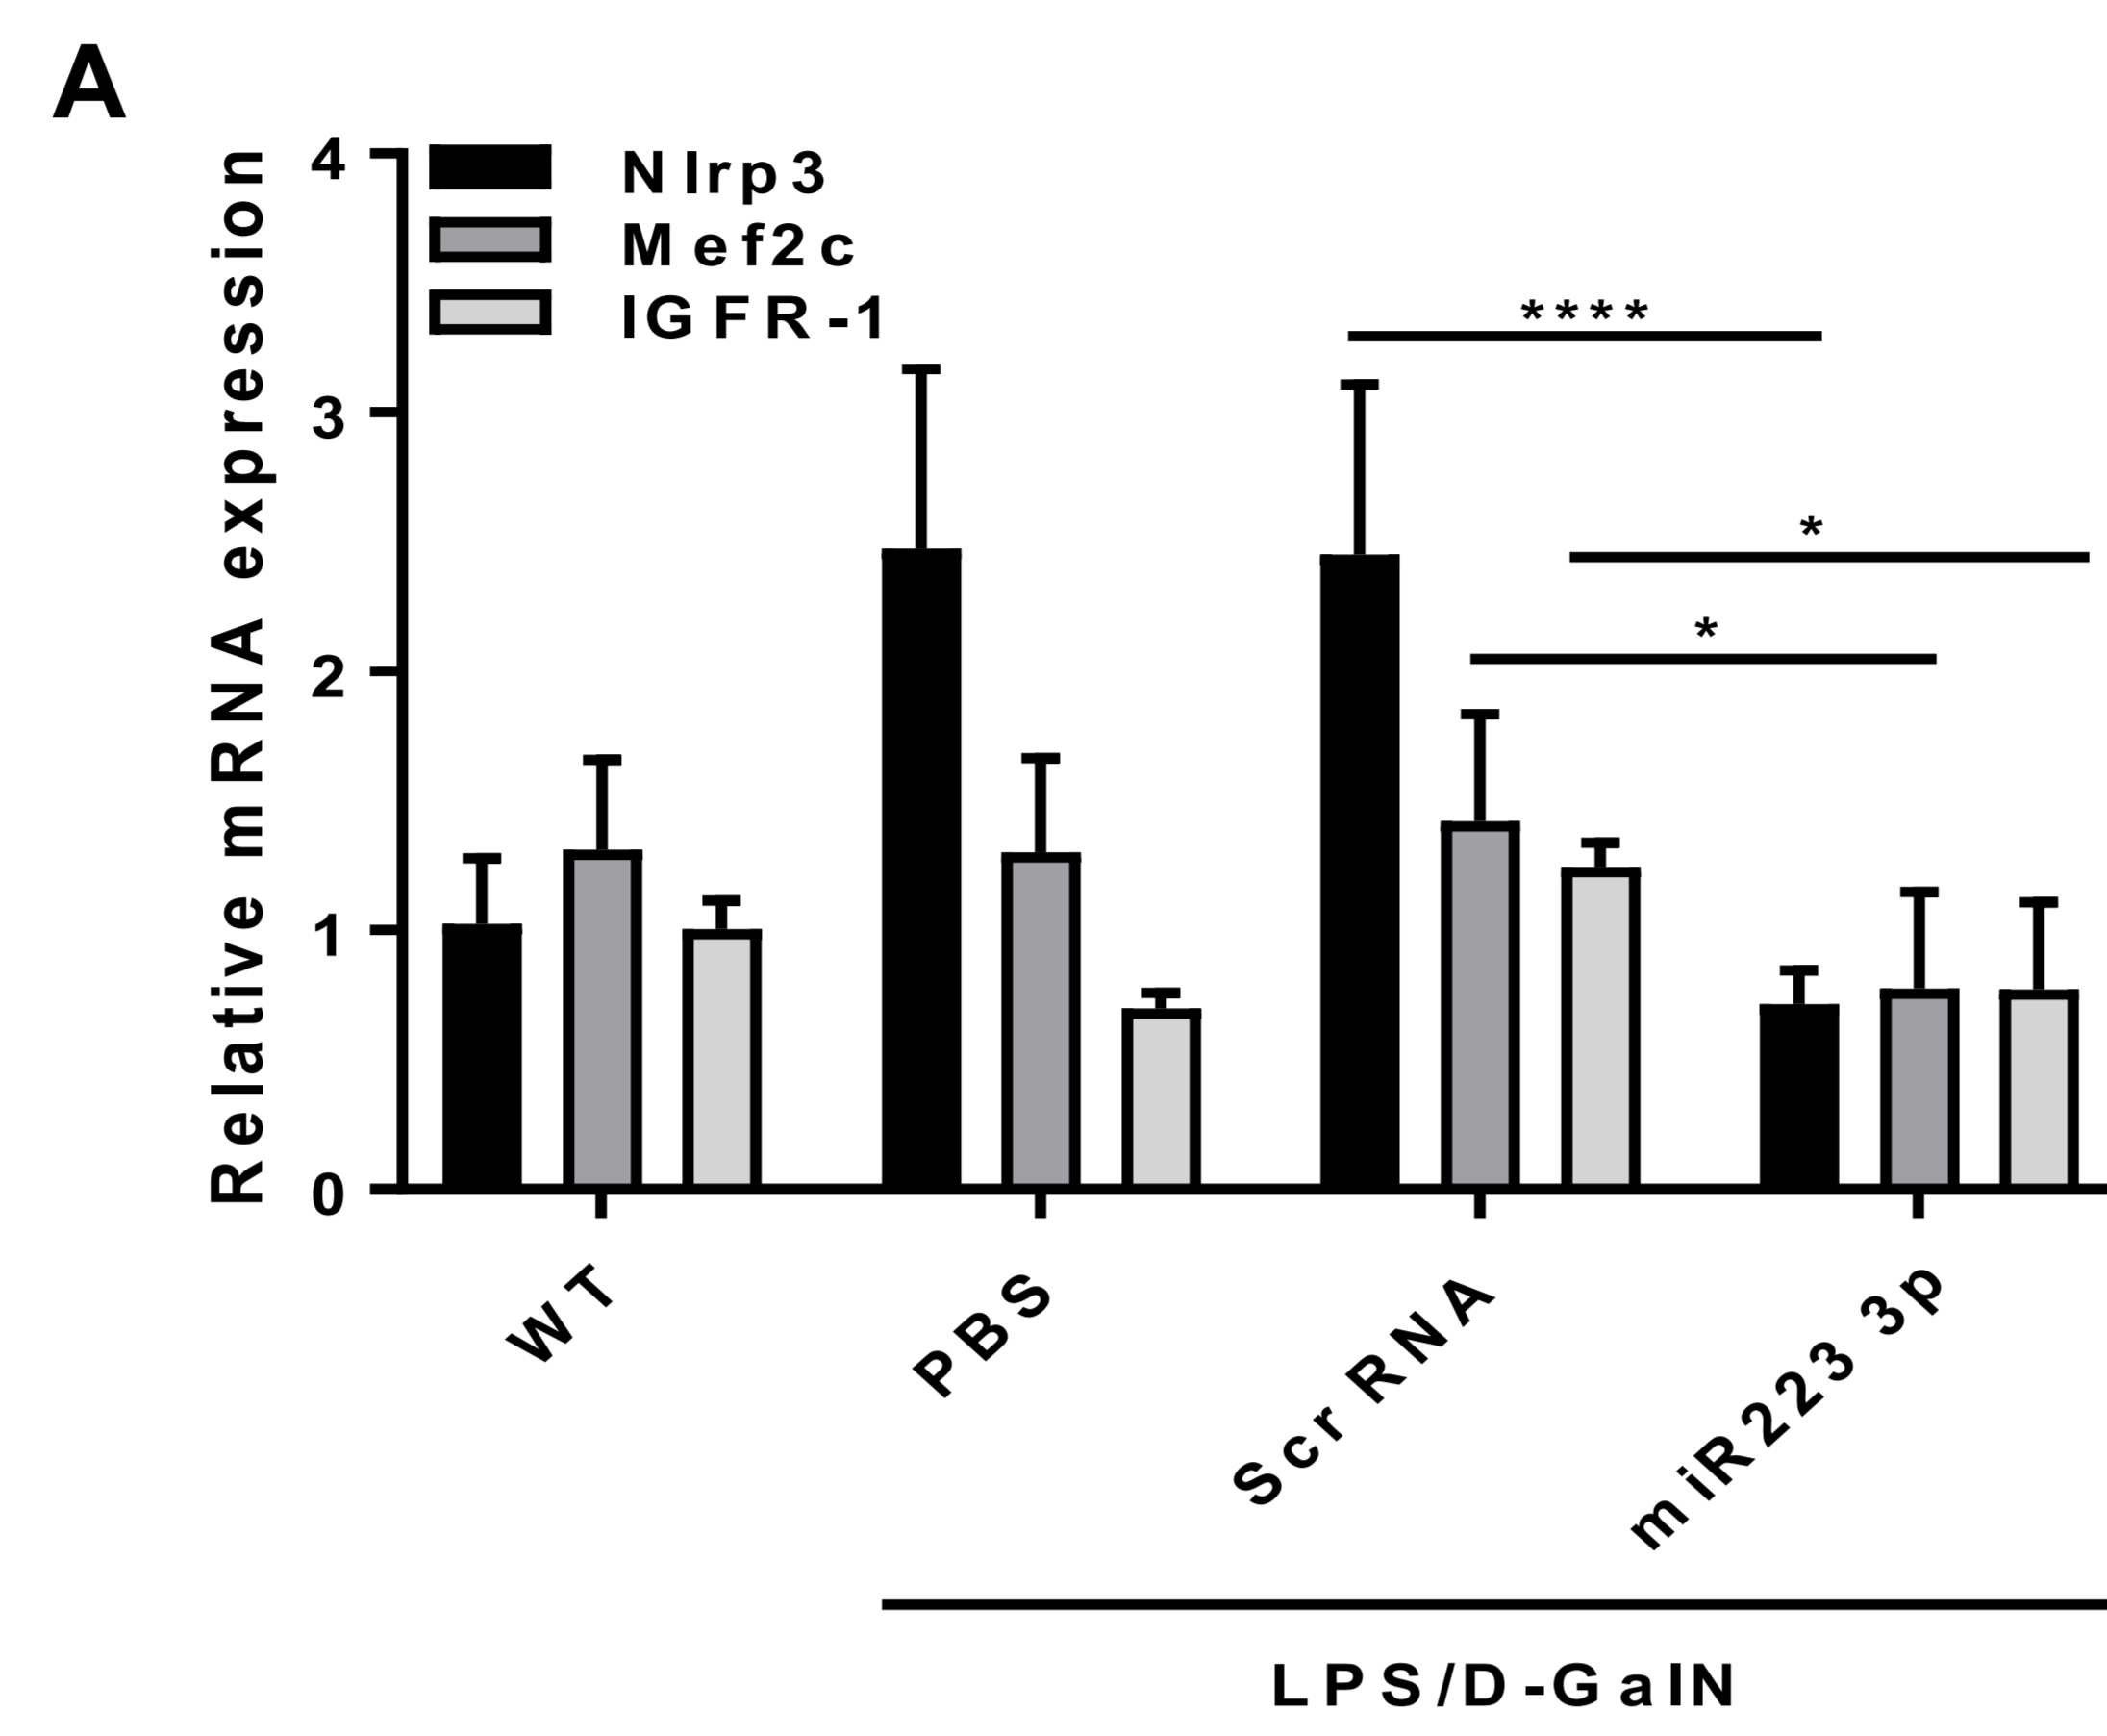

**Fig. S1 (A)** Relative mRNA expression of *Nlrp3*, *Mef2c* and *Igfr1* measured by qRT-PCR and normalized by *B2m*. \* $P < 0.05$ , \*\*\*\* $P < 0.0001$ , two-way ANOVA. Results show means  $\pm$  SD,  $n = 7-10$ /group

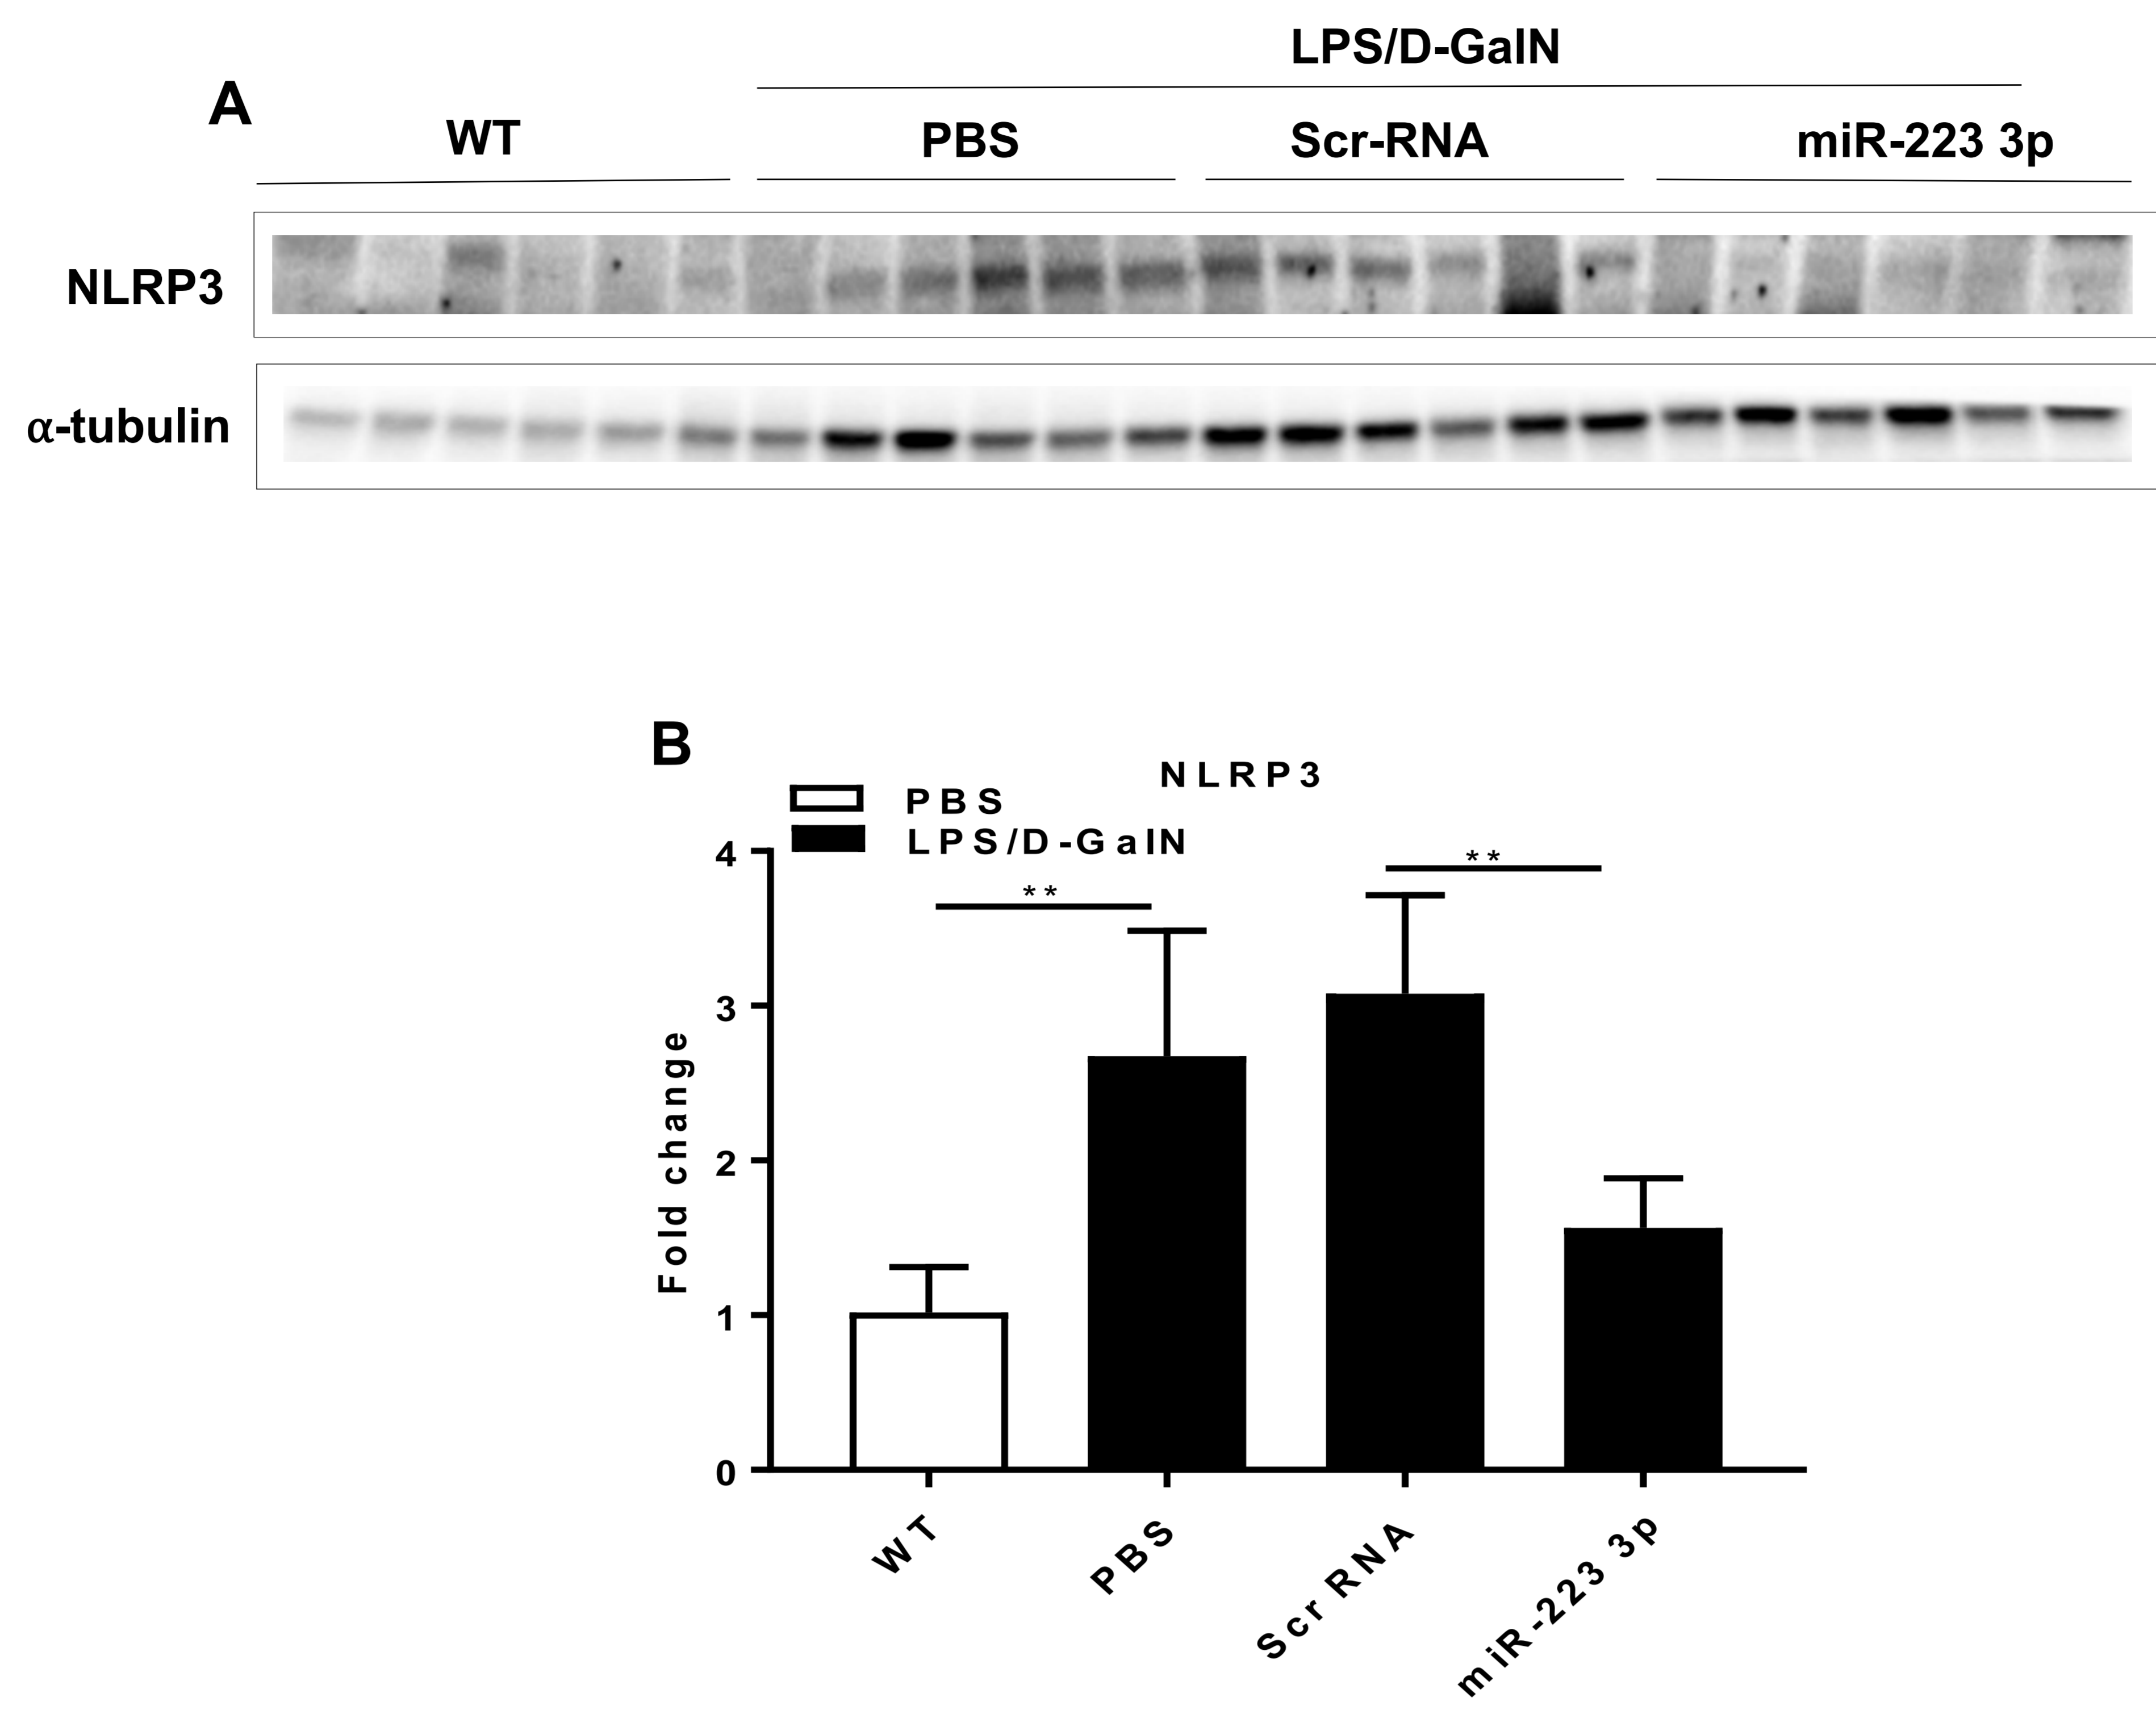

**Fig. S2 (A)** Western blots of NLRP3 and  $\alpha$ -tubulin proteins (original blots shown in Supplementary Figure 3). **(B)** Fold change of intensity of protein bands of NLRP3 shown in **Fig S2A**. Normalization by the housekeeping protein  $\alpha$ -tubulin. \*\* $P$ <0.01; one-way ANOVA. Data are represented as means  $\pm$  SD,  $n$ =6/group.

**A**

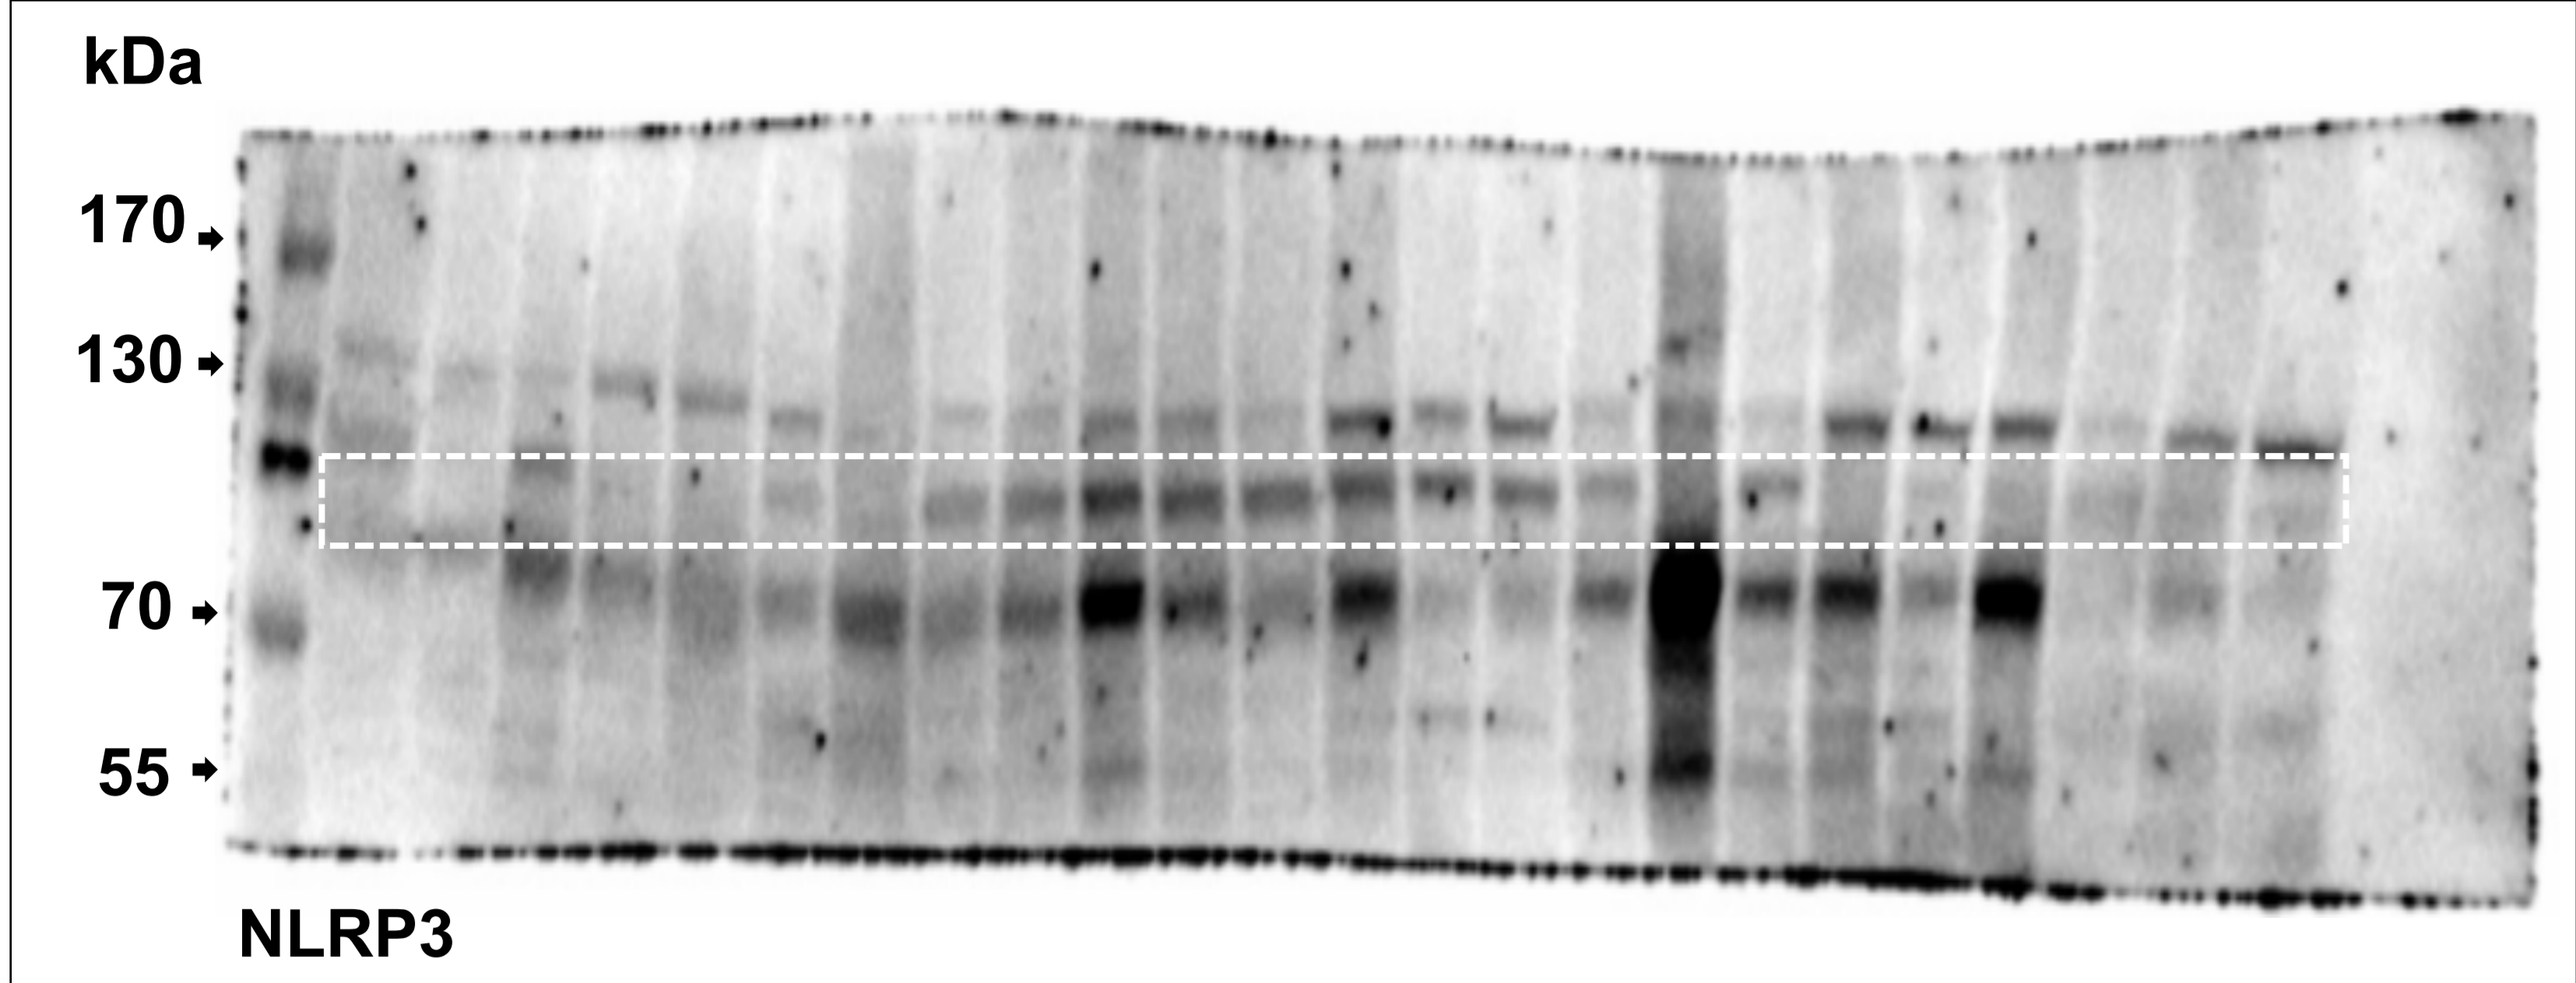

**B**

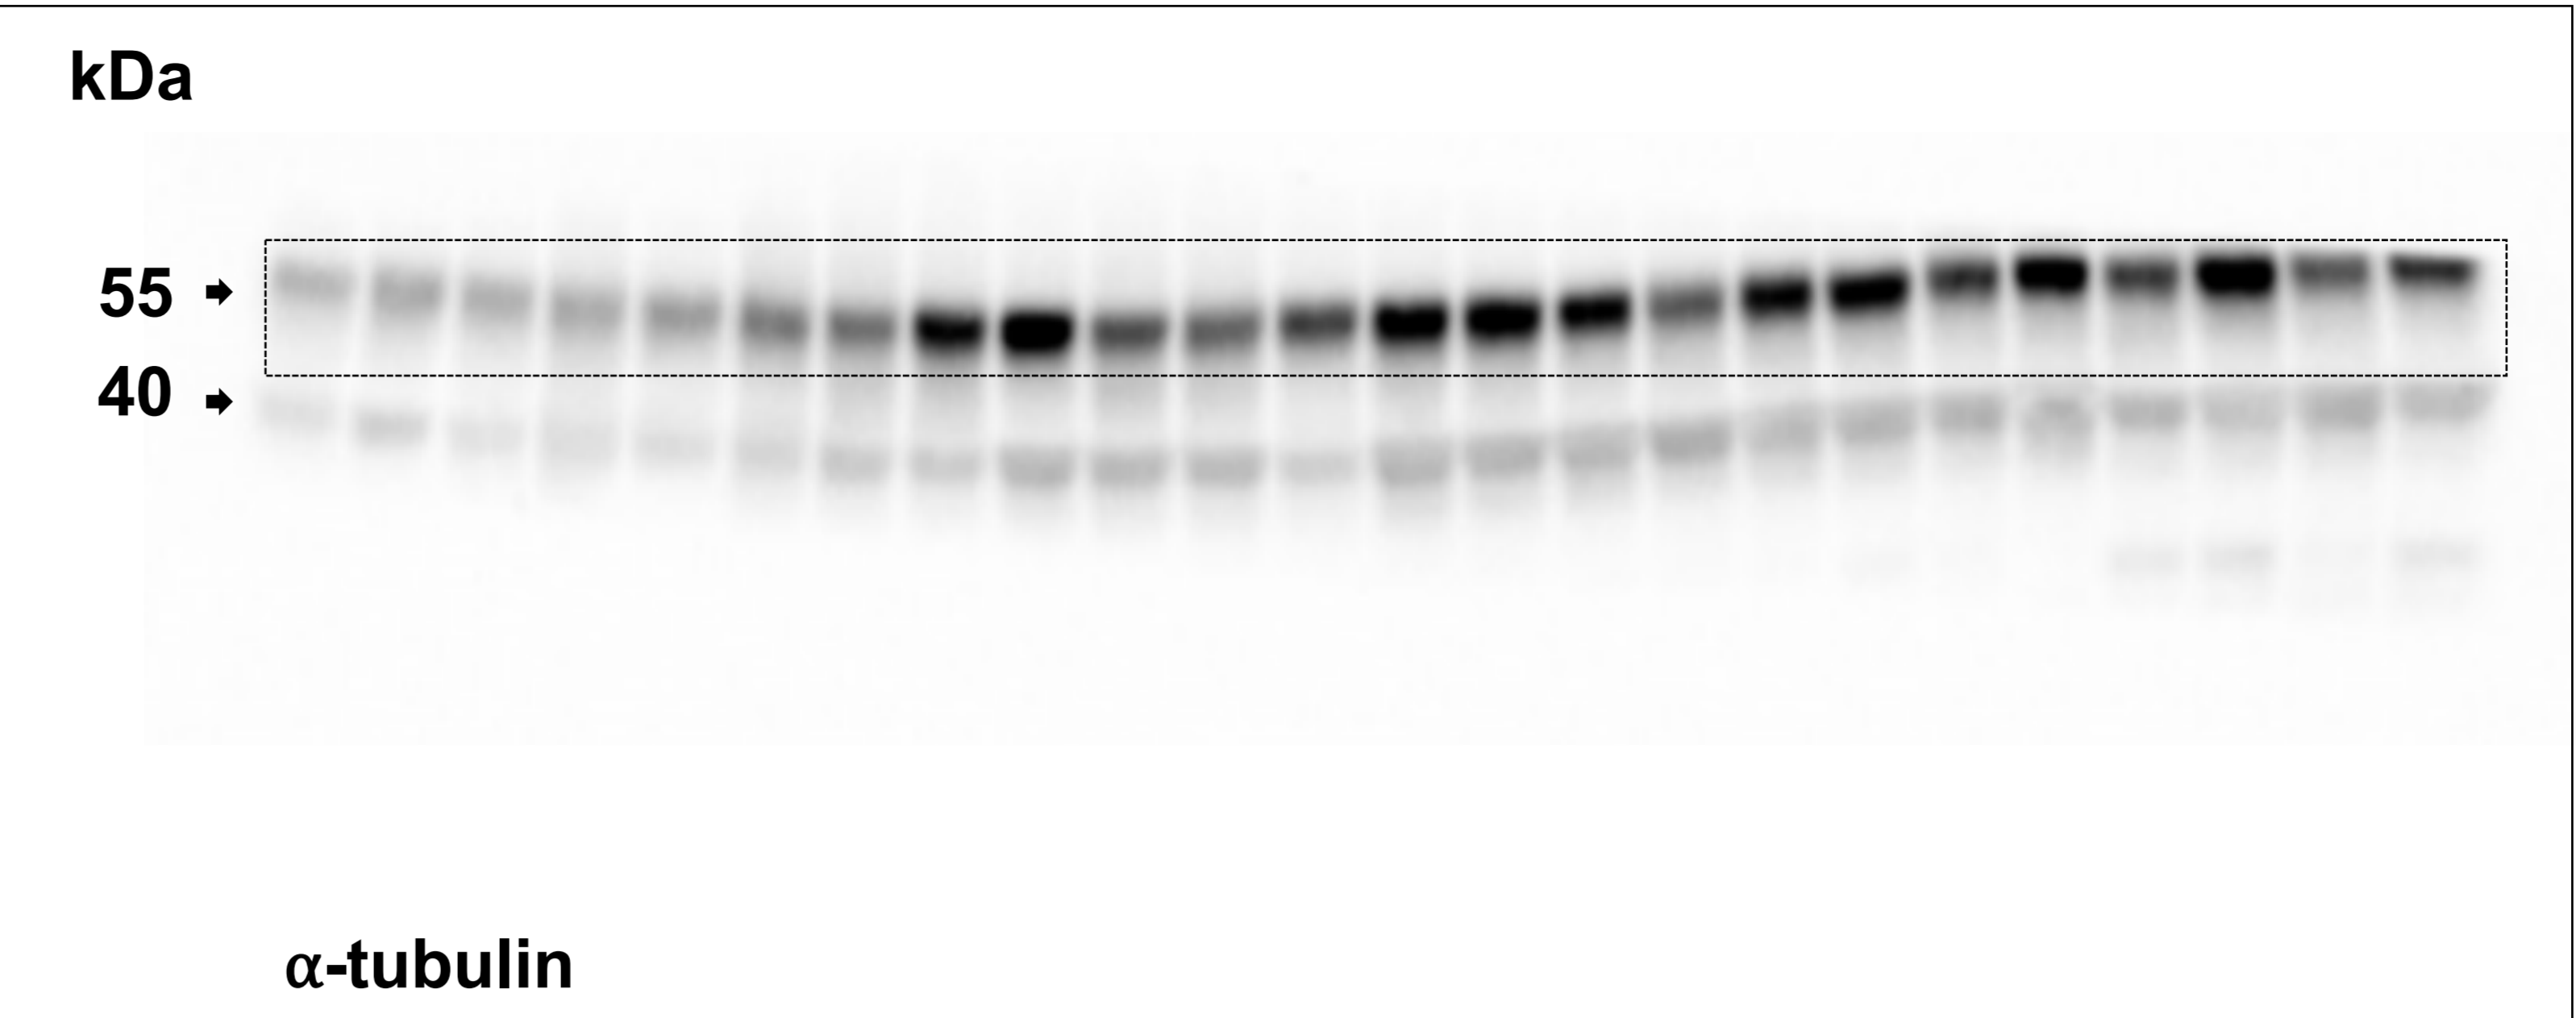

**C**

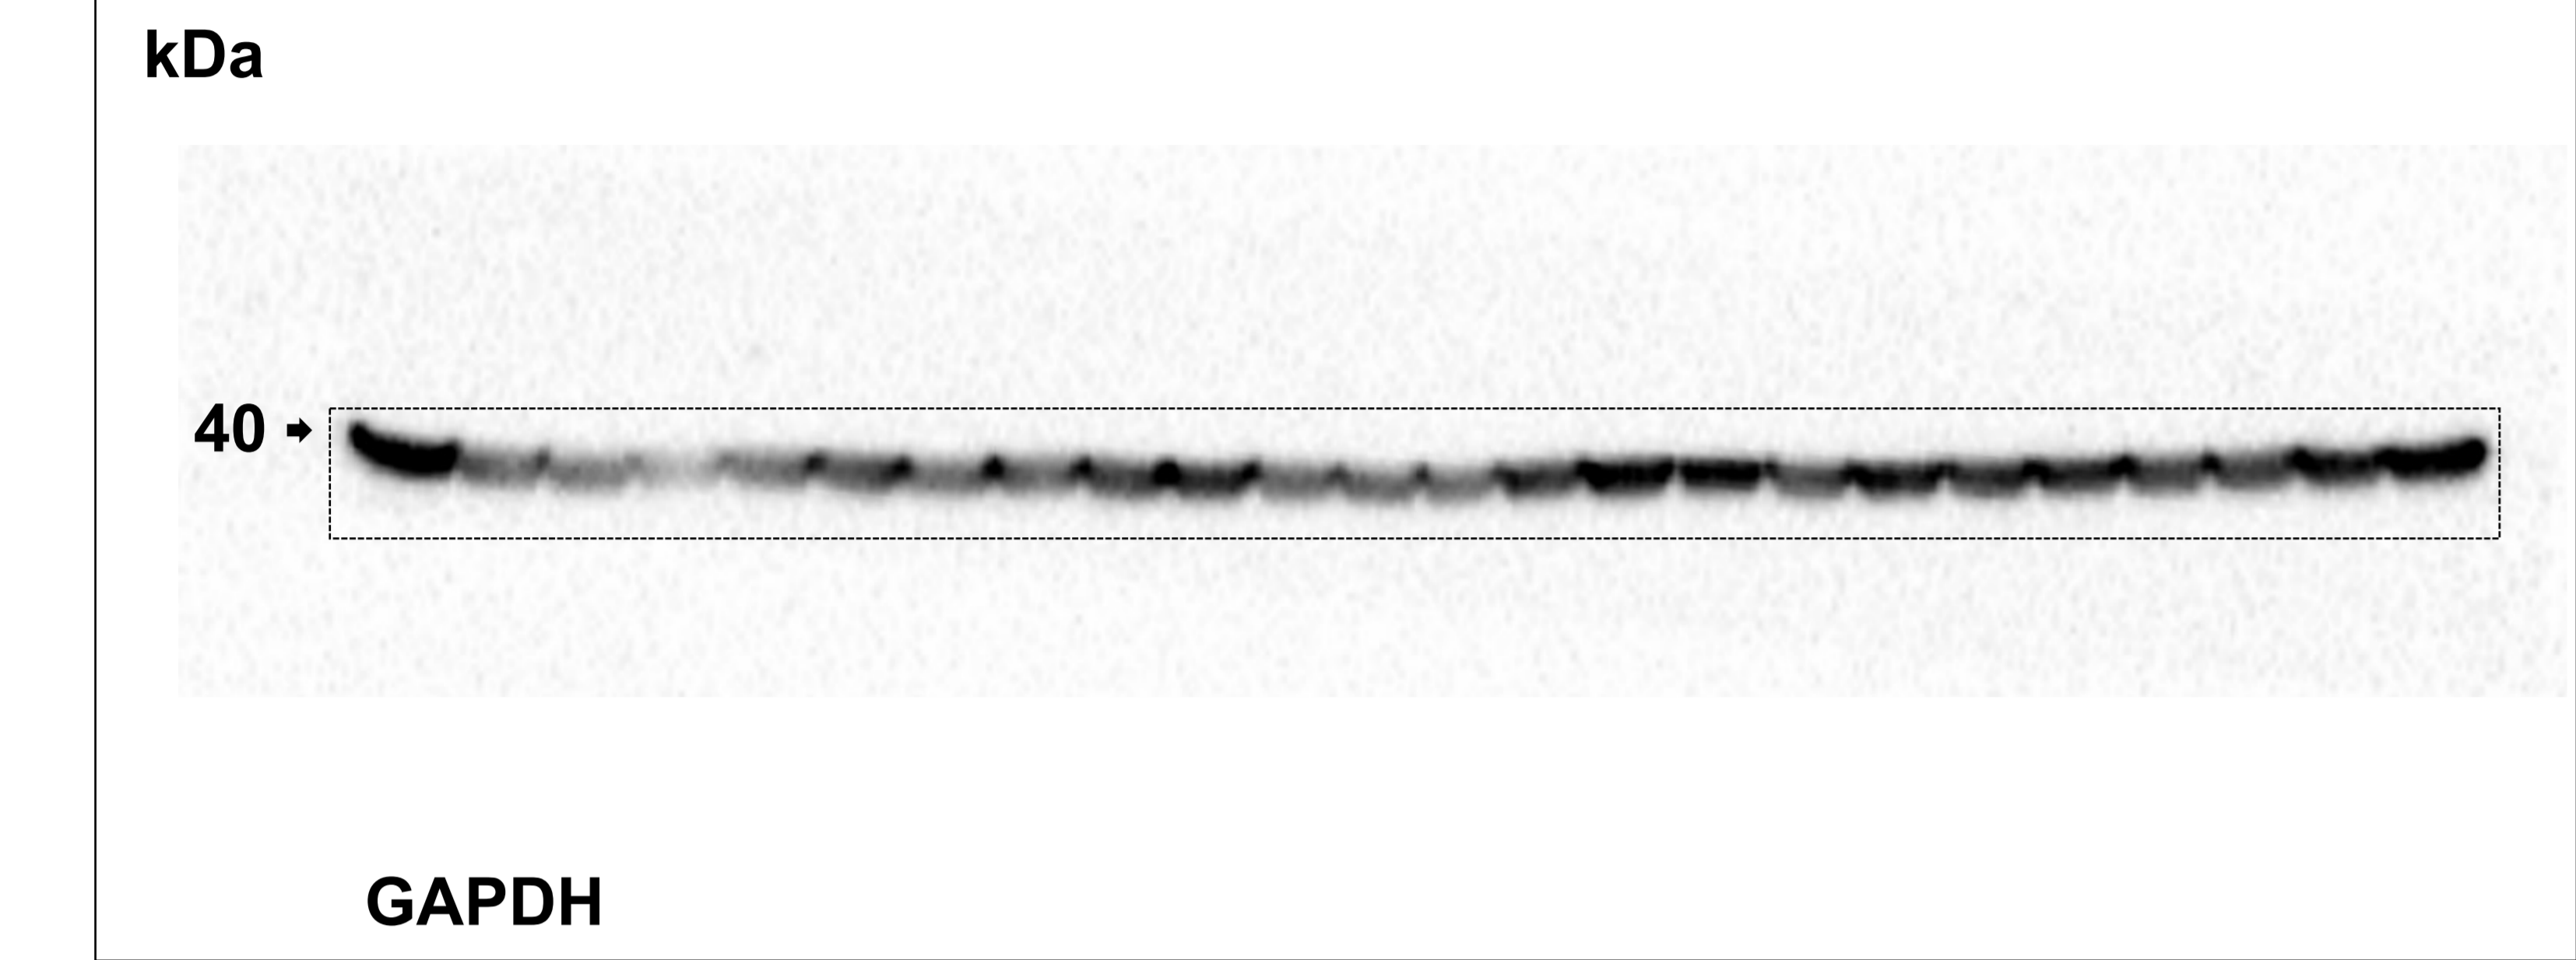

**D**

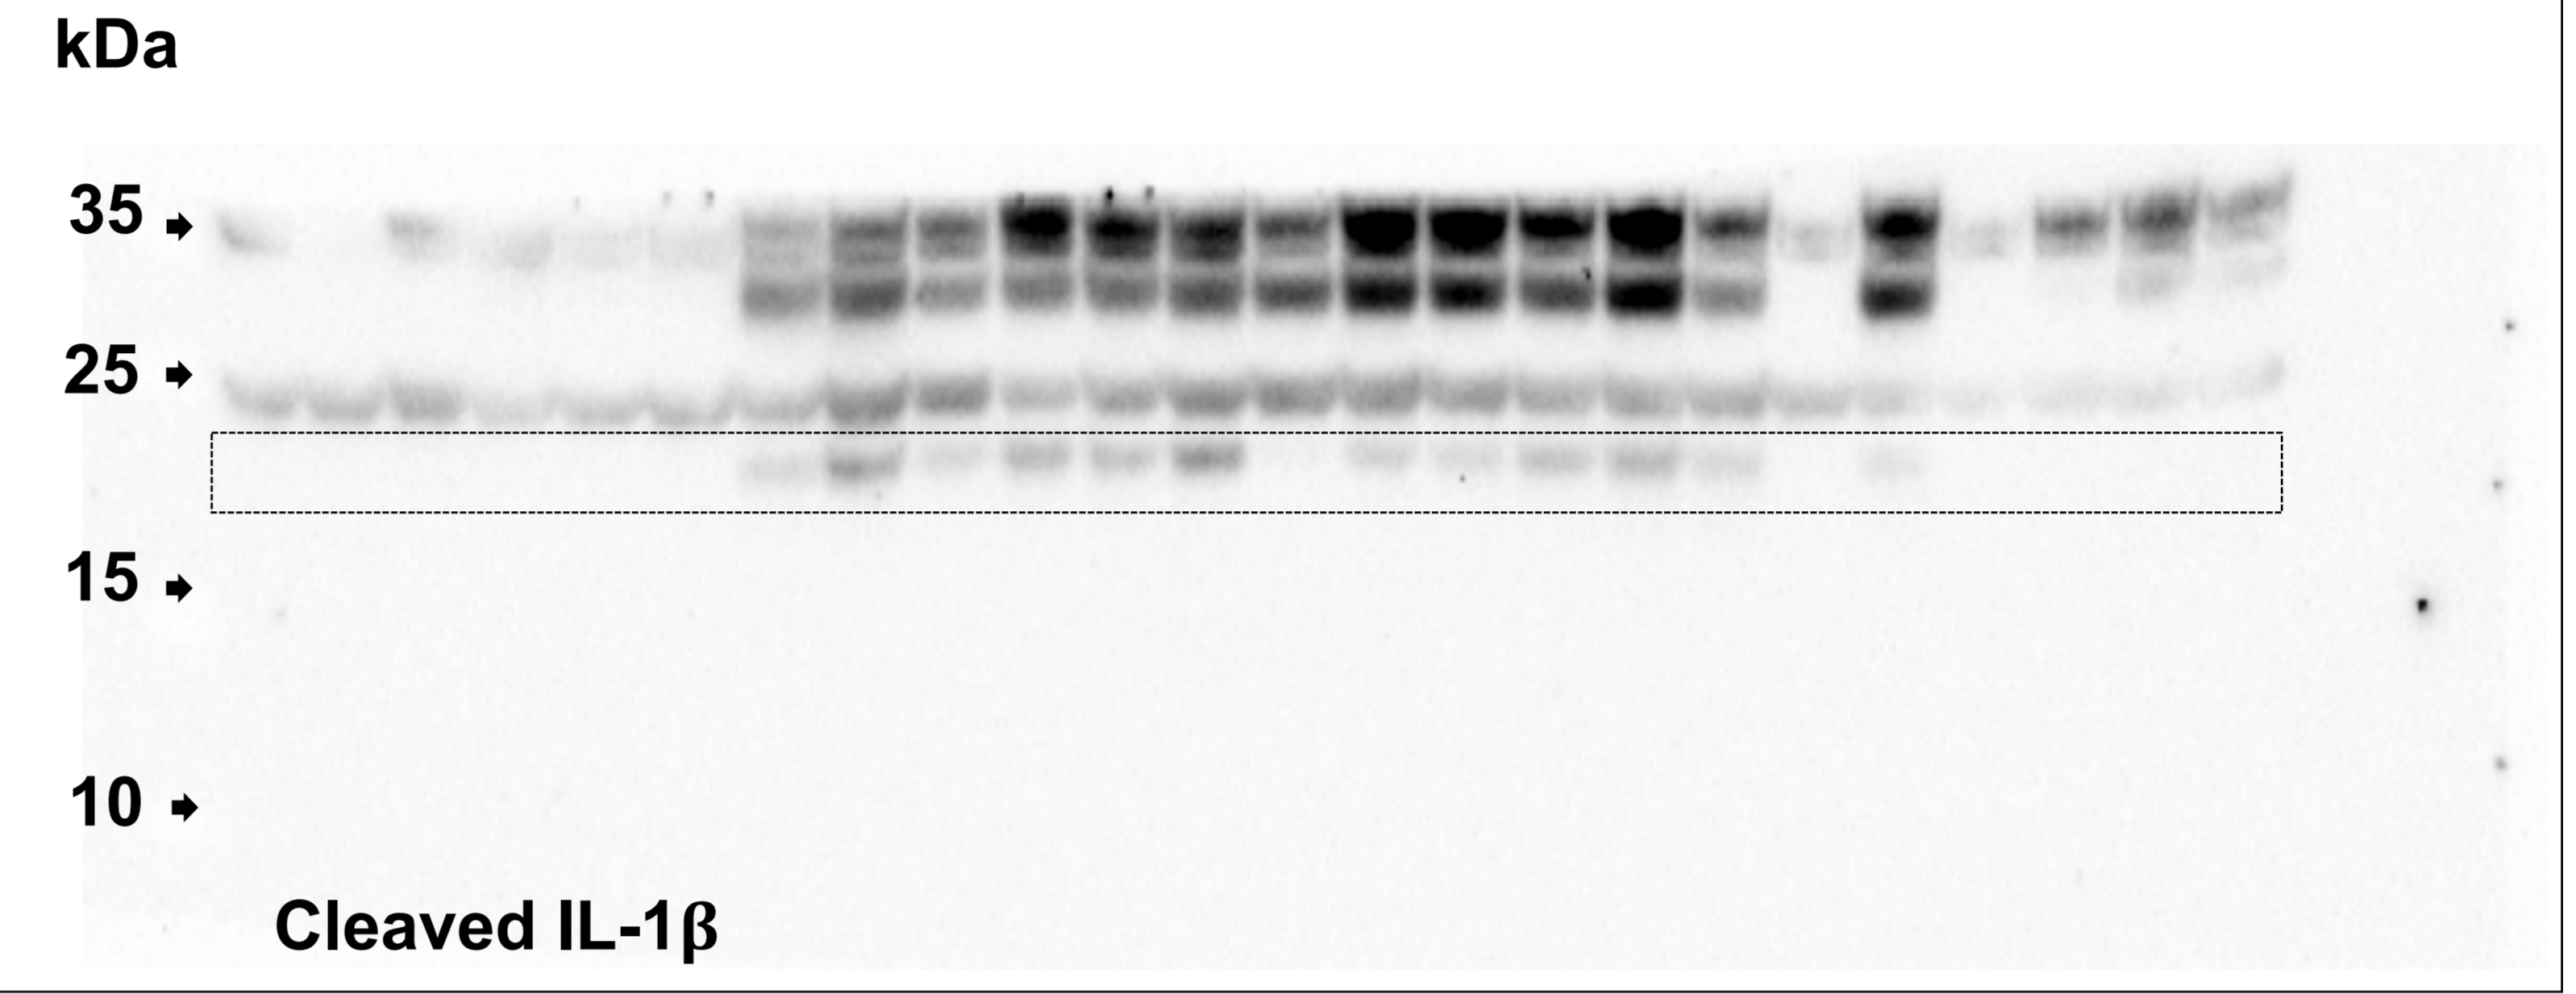

**Fig. S2 (A-F)** Uncropped protein blots of NLRP3 and  $\alpha$ -tubulin, shown in **Supplementary Figure 2A** and, GAPDH and cleaved IL-1 $\beta$  displayed in **Fig. 2**. Specific protein bands are marked with white or black, slashed quadrants and are selected at predicted molecular weights (kDa) on the left of the blot.

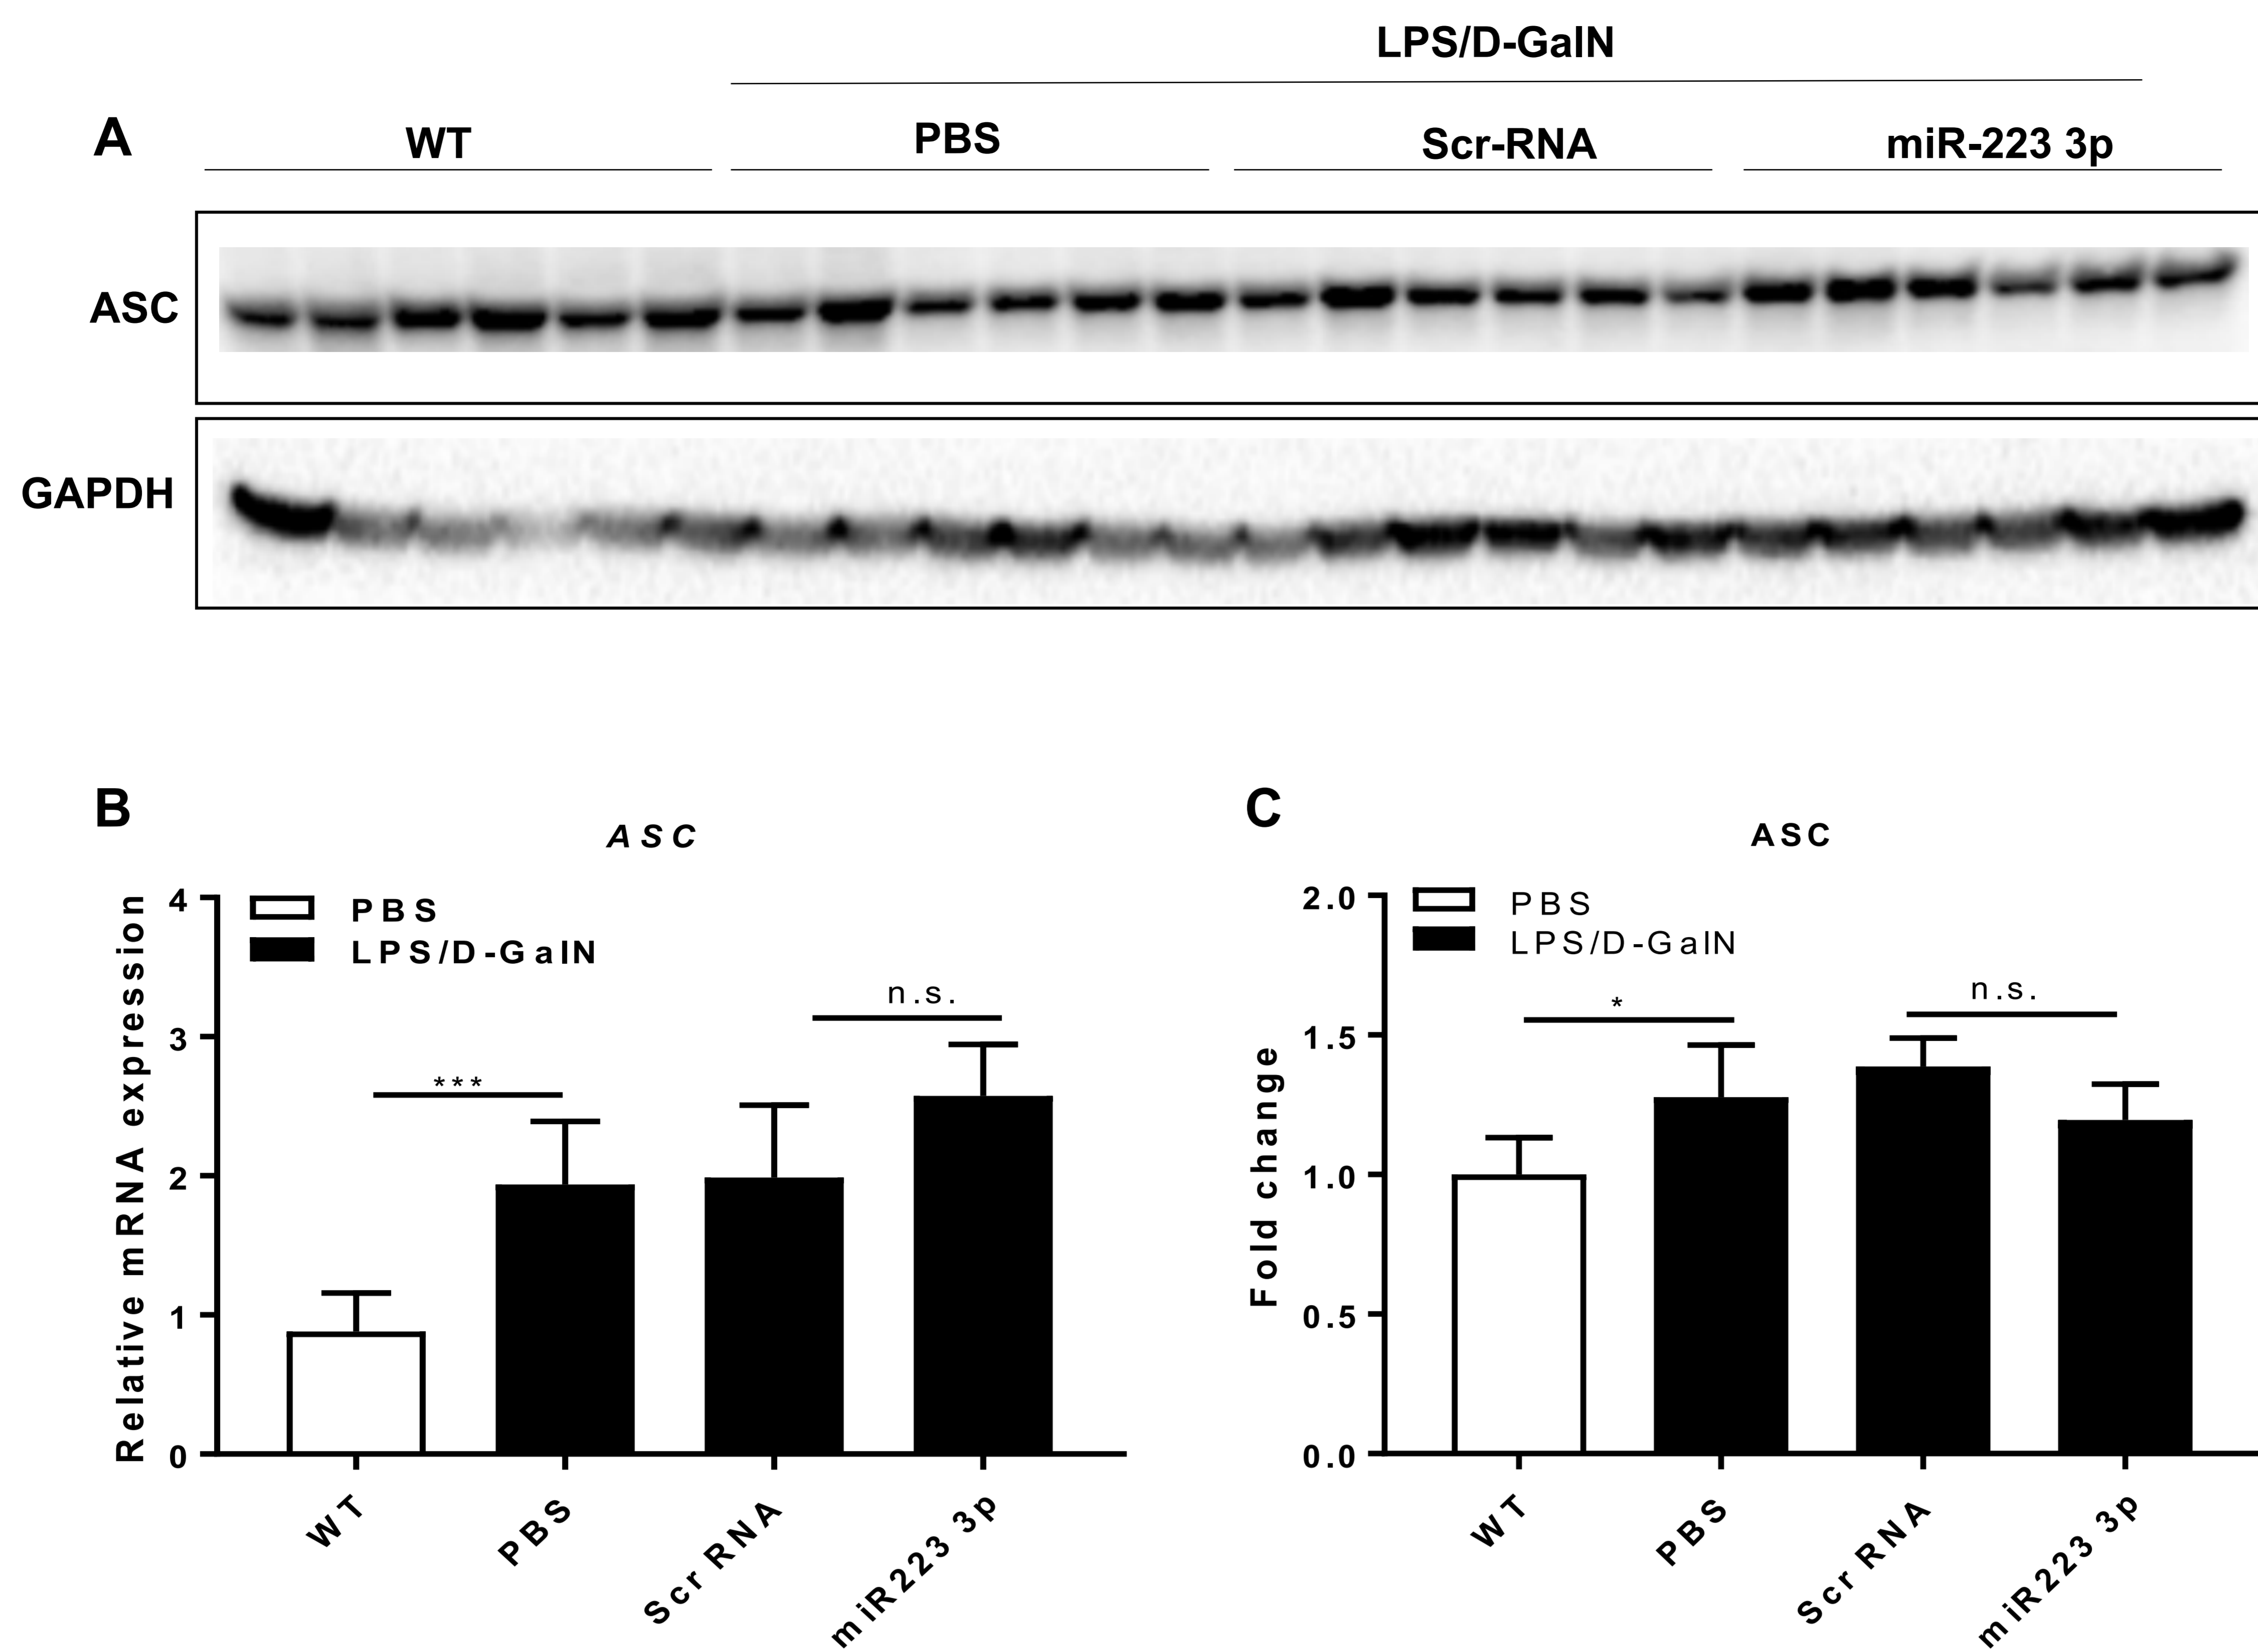

**Fig. S3 (A)** Representative western blots of ASC and GAPDH protein bands (uncropped blots are shown in Supplementary Figure 4) from mouse livers of **experiment in Figure 1A (B)** Relative mRNA expression of *Asc* measured by qRT-PCR and normalized by the housekeeping gene *Gapdh*. **(C)** Fold change of ASC protein levels normalized against GAPDH. \* $P < 0.05$ , \*\*\* $P < 0.001$ ; n.s., not significant; one-way ANOVA. Results show means  $\pm$  SD,  $n = 7-10$ /group.

**A**

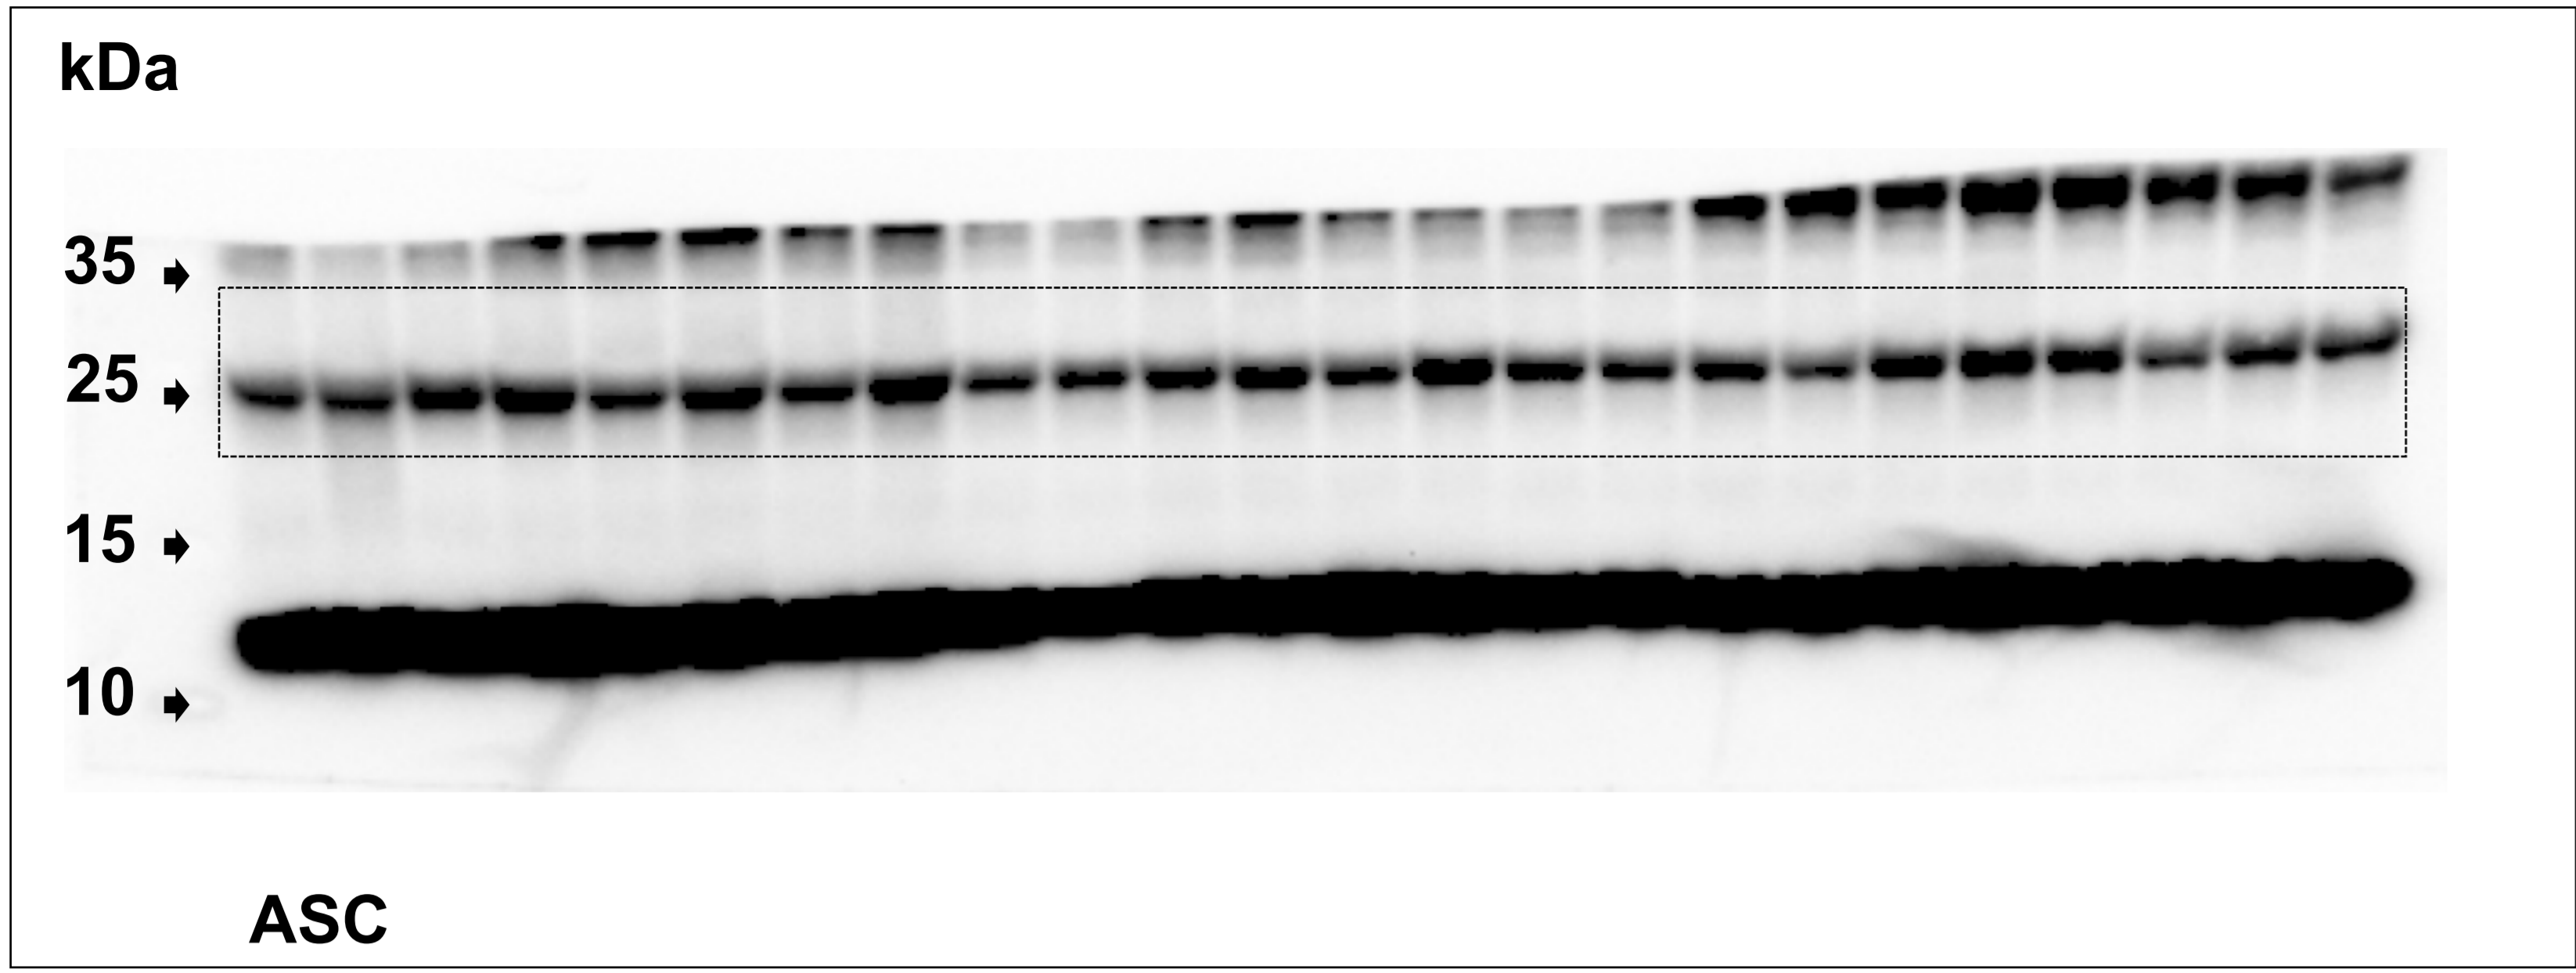

**B**

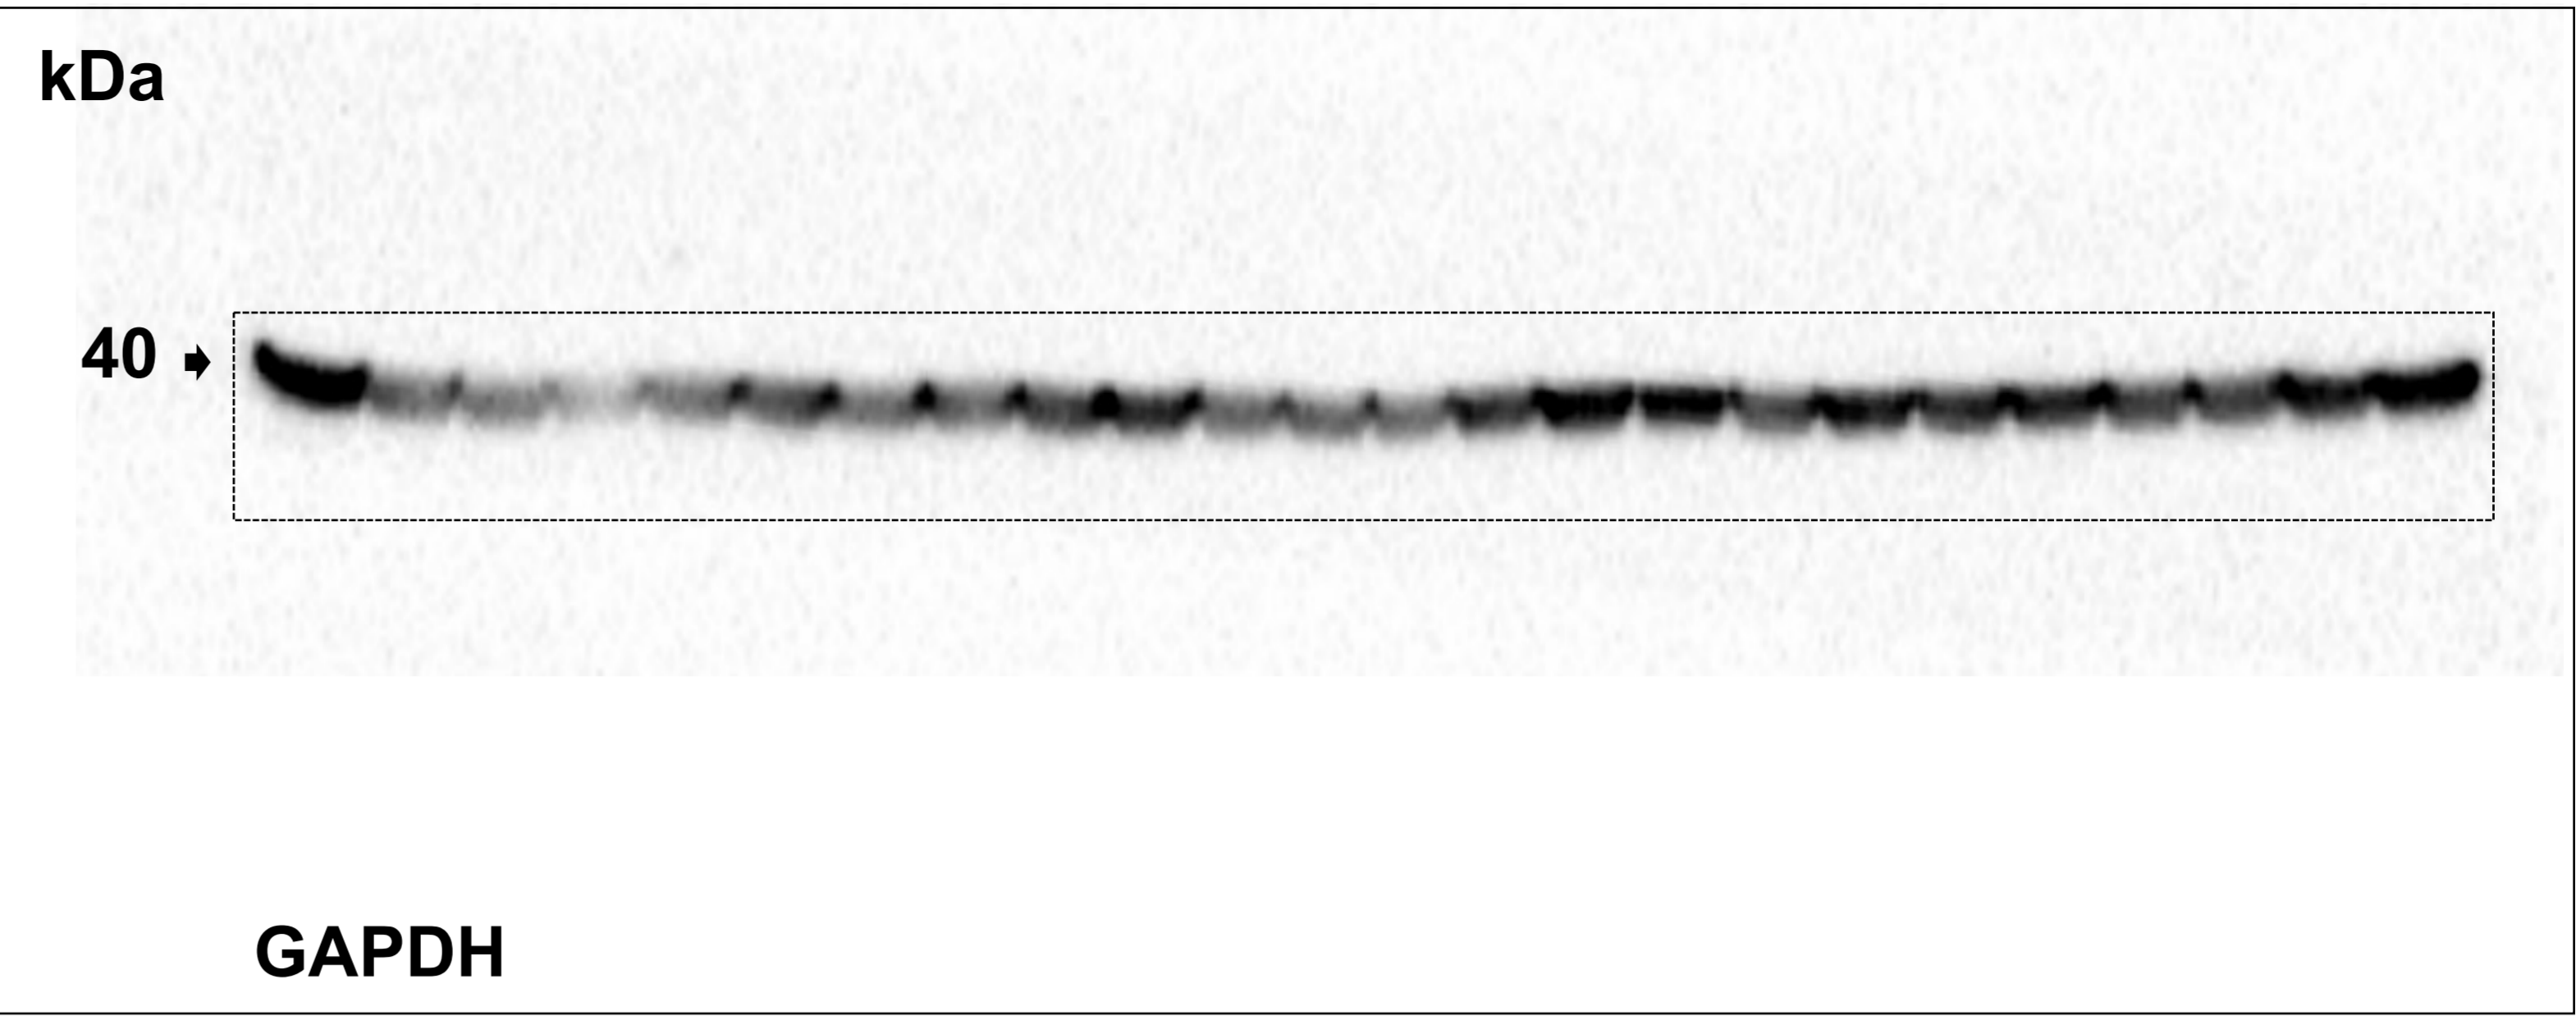

**Fig. S4 (A-B)** Uncropped protein blots of ASC and GAPDH displayed in **Fig. S3**. Specific protein bands are marked with white or black, slashed quadrants and are selected at predicted molecular weights (kDa) on the left of the blot.

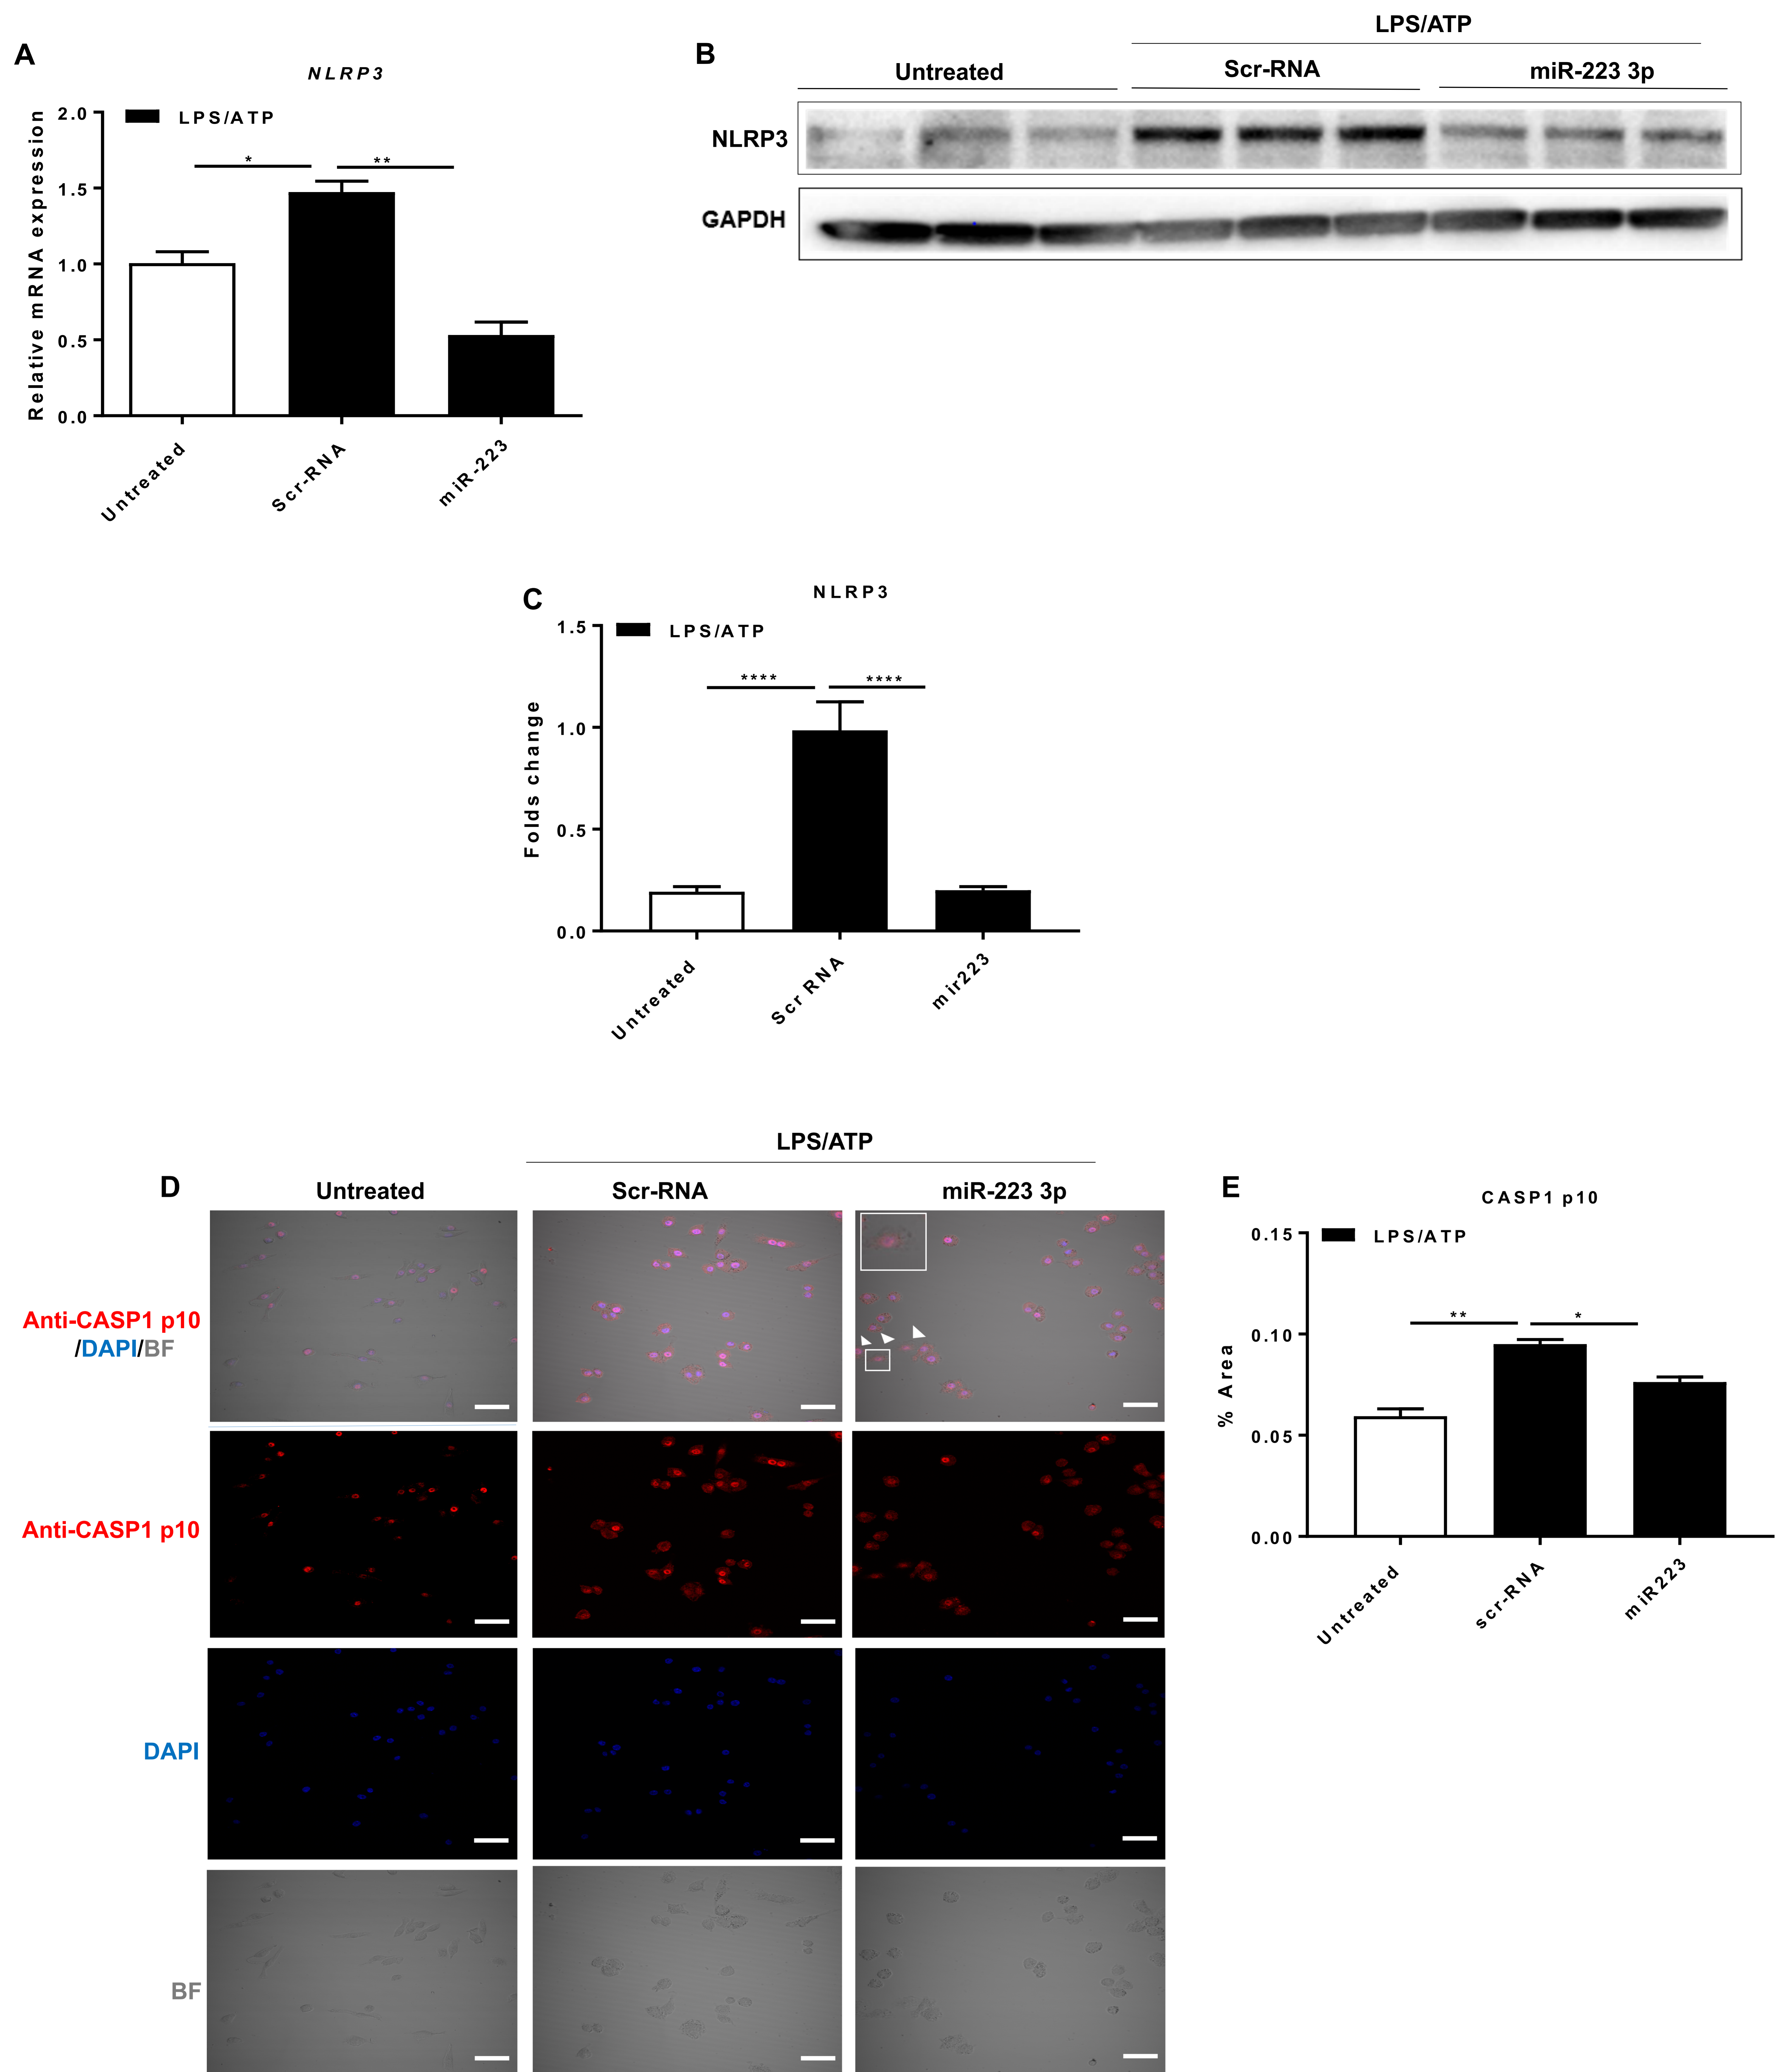

**Fig. S5** (A) Relative *Nlrp3* mRNA expression assessed by qRT-PCR and normalized by the housekeeping gene *Gapdh* in J744.2 macrophages transfected with miR-223 3p or Scr-RNA control and pre-treated or untreated with LPS/ATP (B) Representative Western blots of NLRP3 and GAPDH protein bands from experiment described in A (original blots are shown in **Supplementary Figure 6**). (C-E) Fold change of NLRP3 levels normalized by the housekeeping protein GAPDH. (F) Representative microphotographs of immunofluorescence staining in cells from experiment in A. Alexa Fluor 598-Anti-caspase 1 p10 (active form) antibody shown in red, DAPI in blue represents nuclei and bright filter (BF) shows cellular body in grey. Representative cells with reduced cytosolic signal for anti-caspase 1 p10 are indicated with white arrows and amplified in a slashed upper quadrant. Scale bars=100 μm. (G) Percentage of fluorescence area normalized by total number of cells per field. \* $P<0.05$ ; \*\* $P<0.01$ ; \*\*\*\* $P<0.0001$ ; n.s., not significant, one-way ANOVA. Results show means  $\pm$  SD,  $n=3$ /group

A

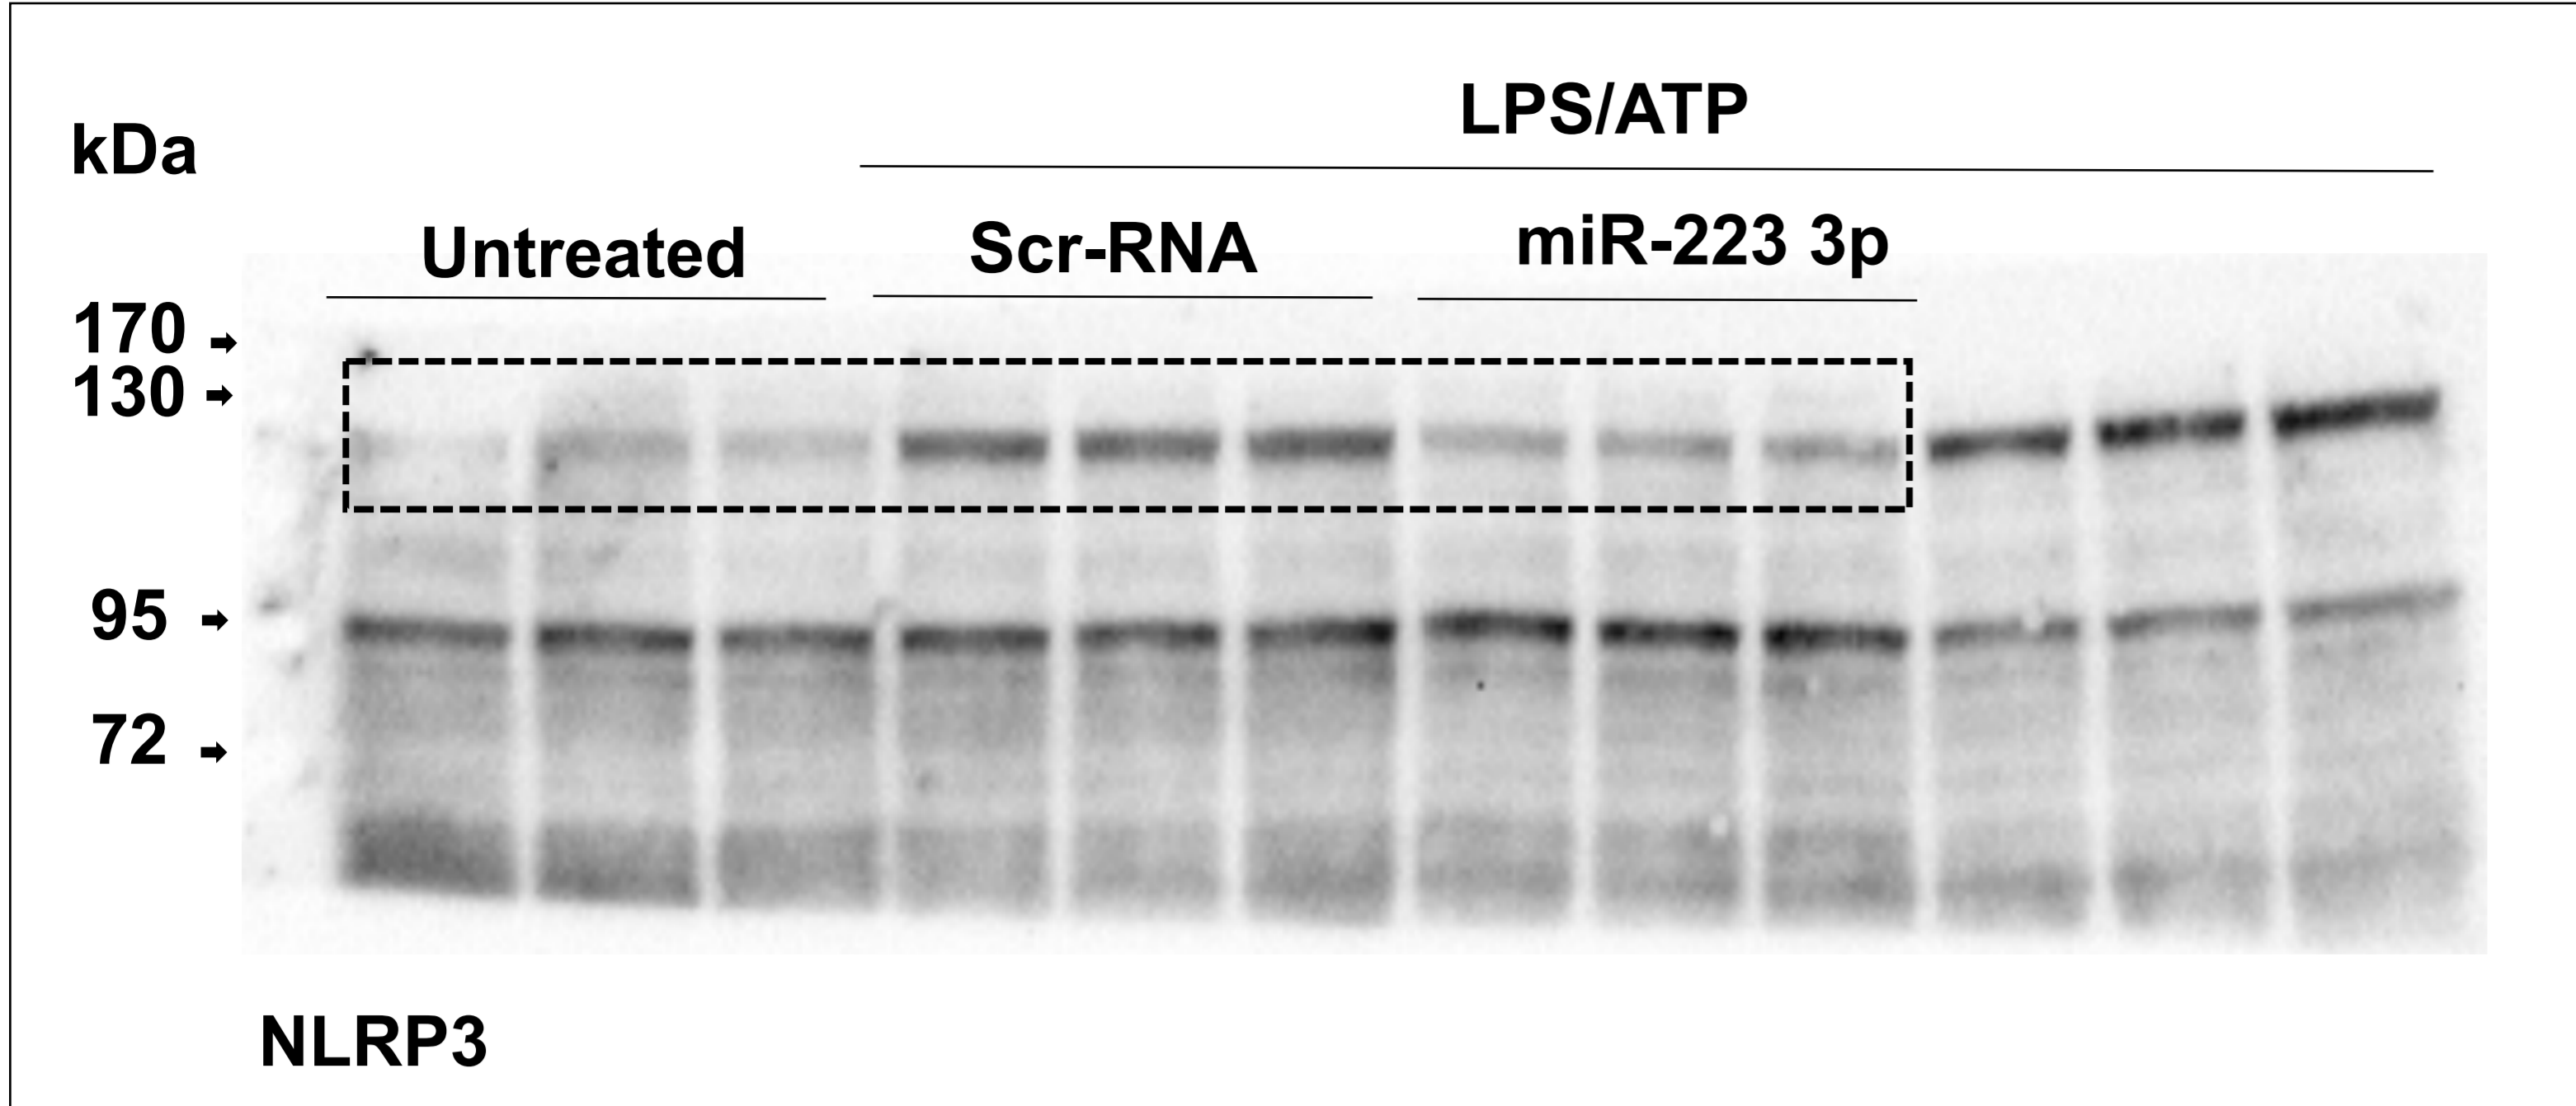

B

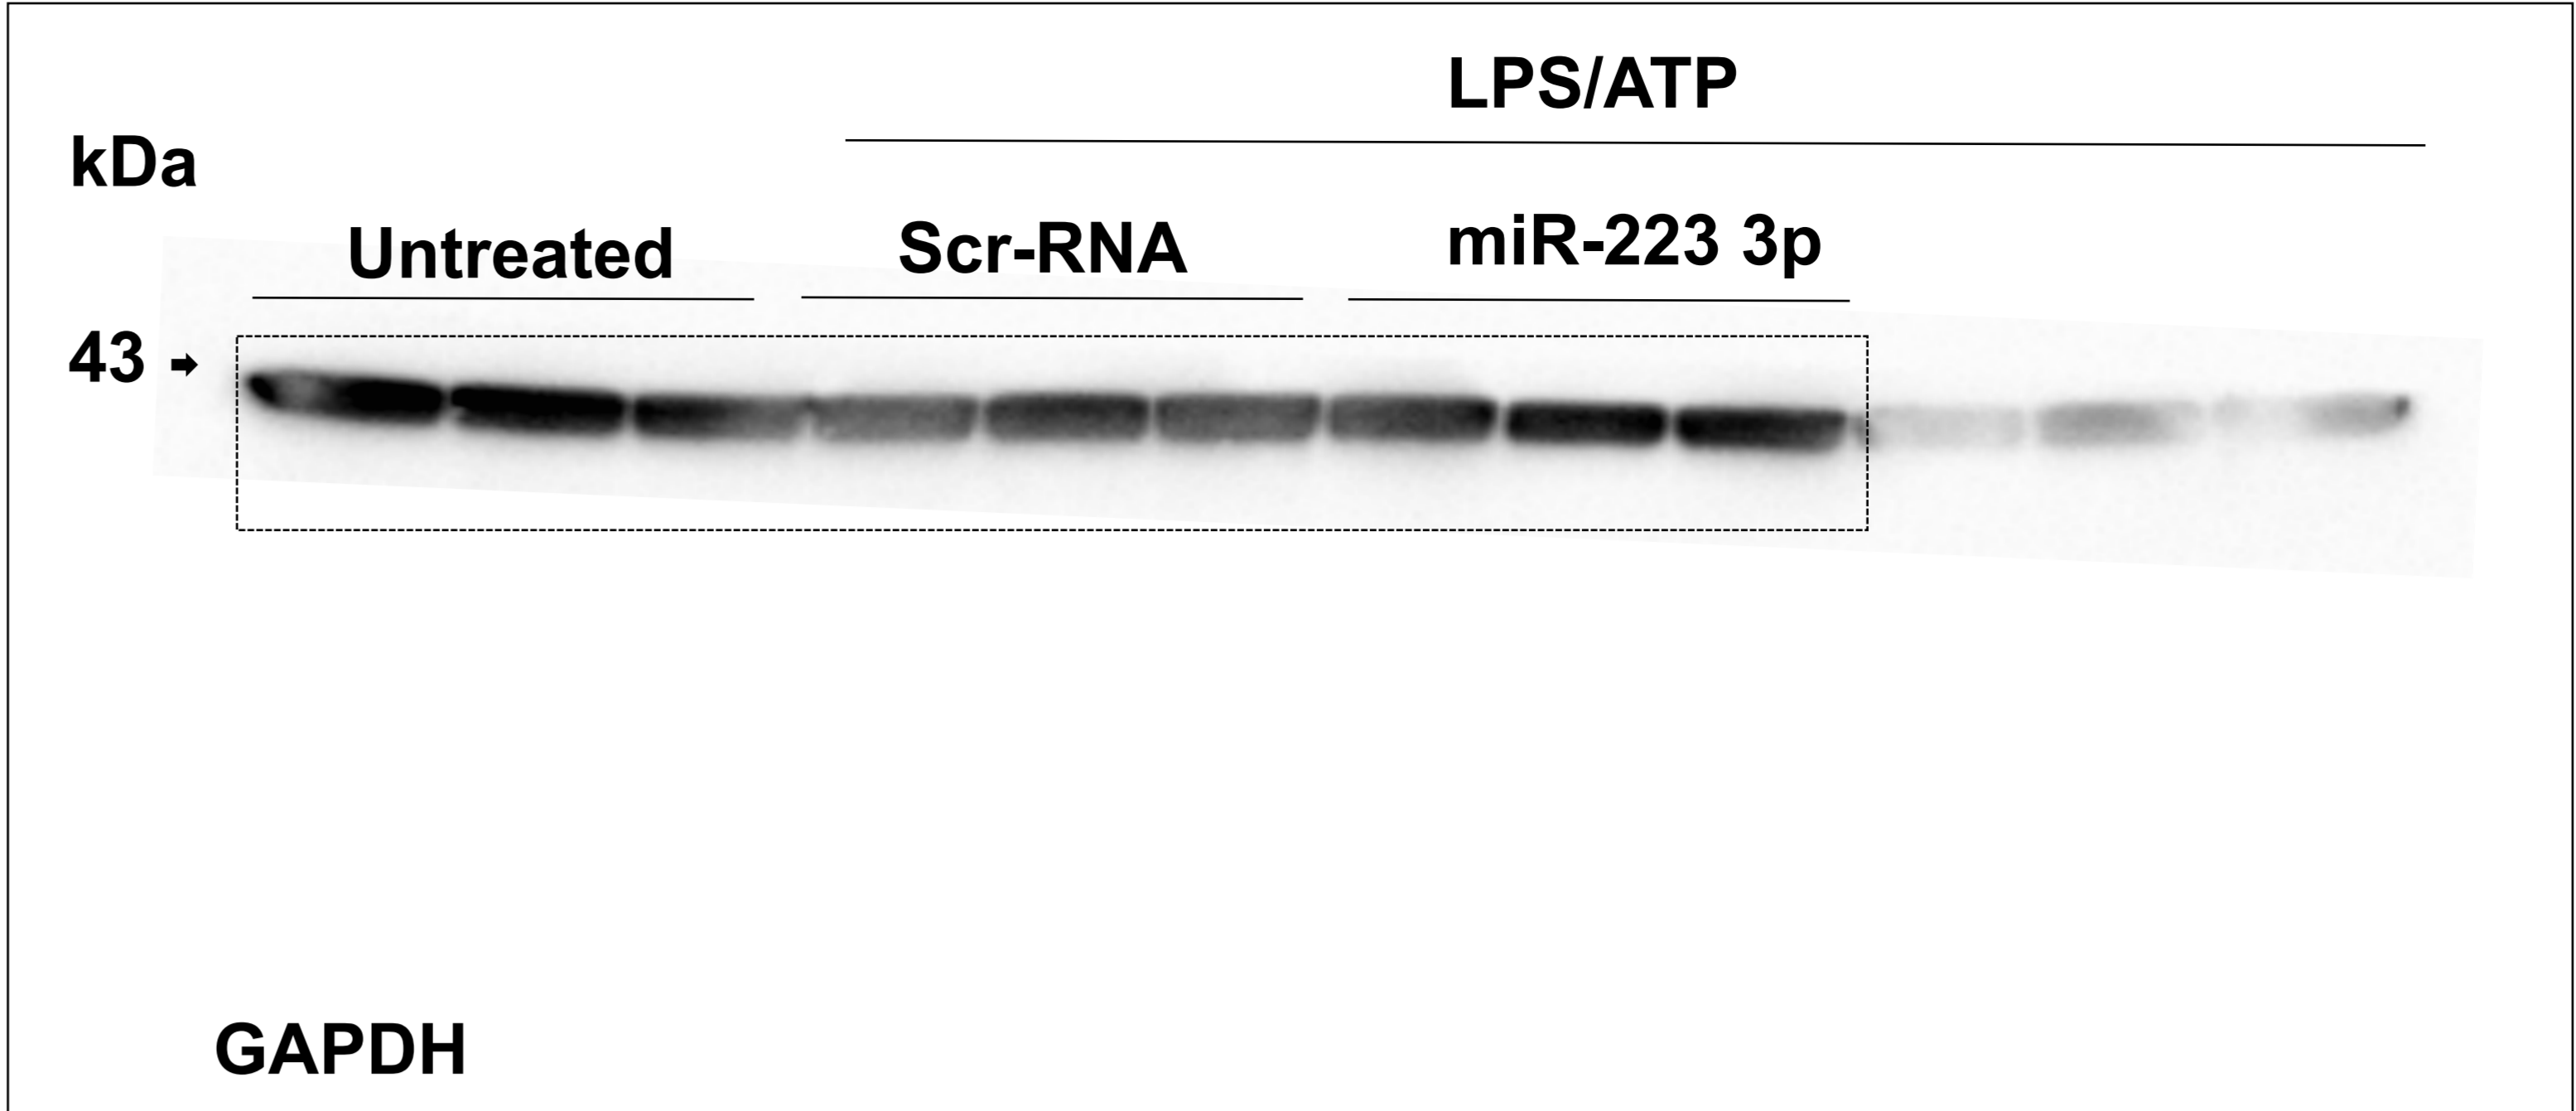

**Fig. S6 (A-D)** Uncropped protein blots of NLRP3 and GAPDH shown in **Fig. S5**. Specific protein bands are marked with white or black, slashed quadrants and are selected at predicted molecular weights (kDa) on the left.
